# Supplementary material for: A macrophage-specific lncRNA regulates apoptosis and atherosclerosis by tethering HuR in the nucleus
Source: PubMed Central journal article supplement (PMC7708640; doi:10.1038/s41467-020-19664-2), 2020-12-01
Supplement: 41467_2020_19664_MOESM3_ESM.pdf [file 41467_2020_19664_MOESM3_ESM.pdf]

Fig. 1I

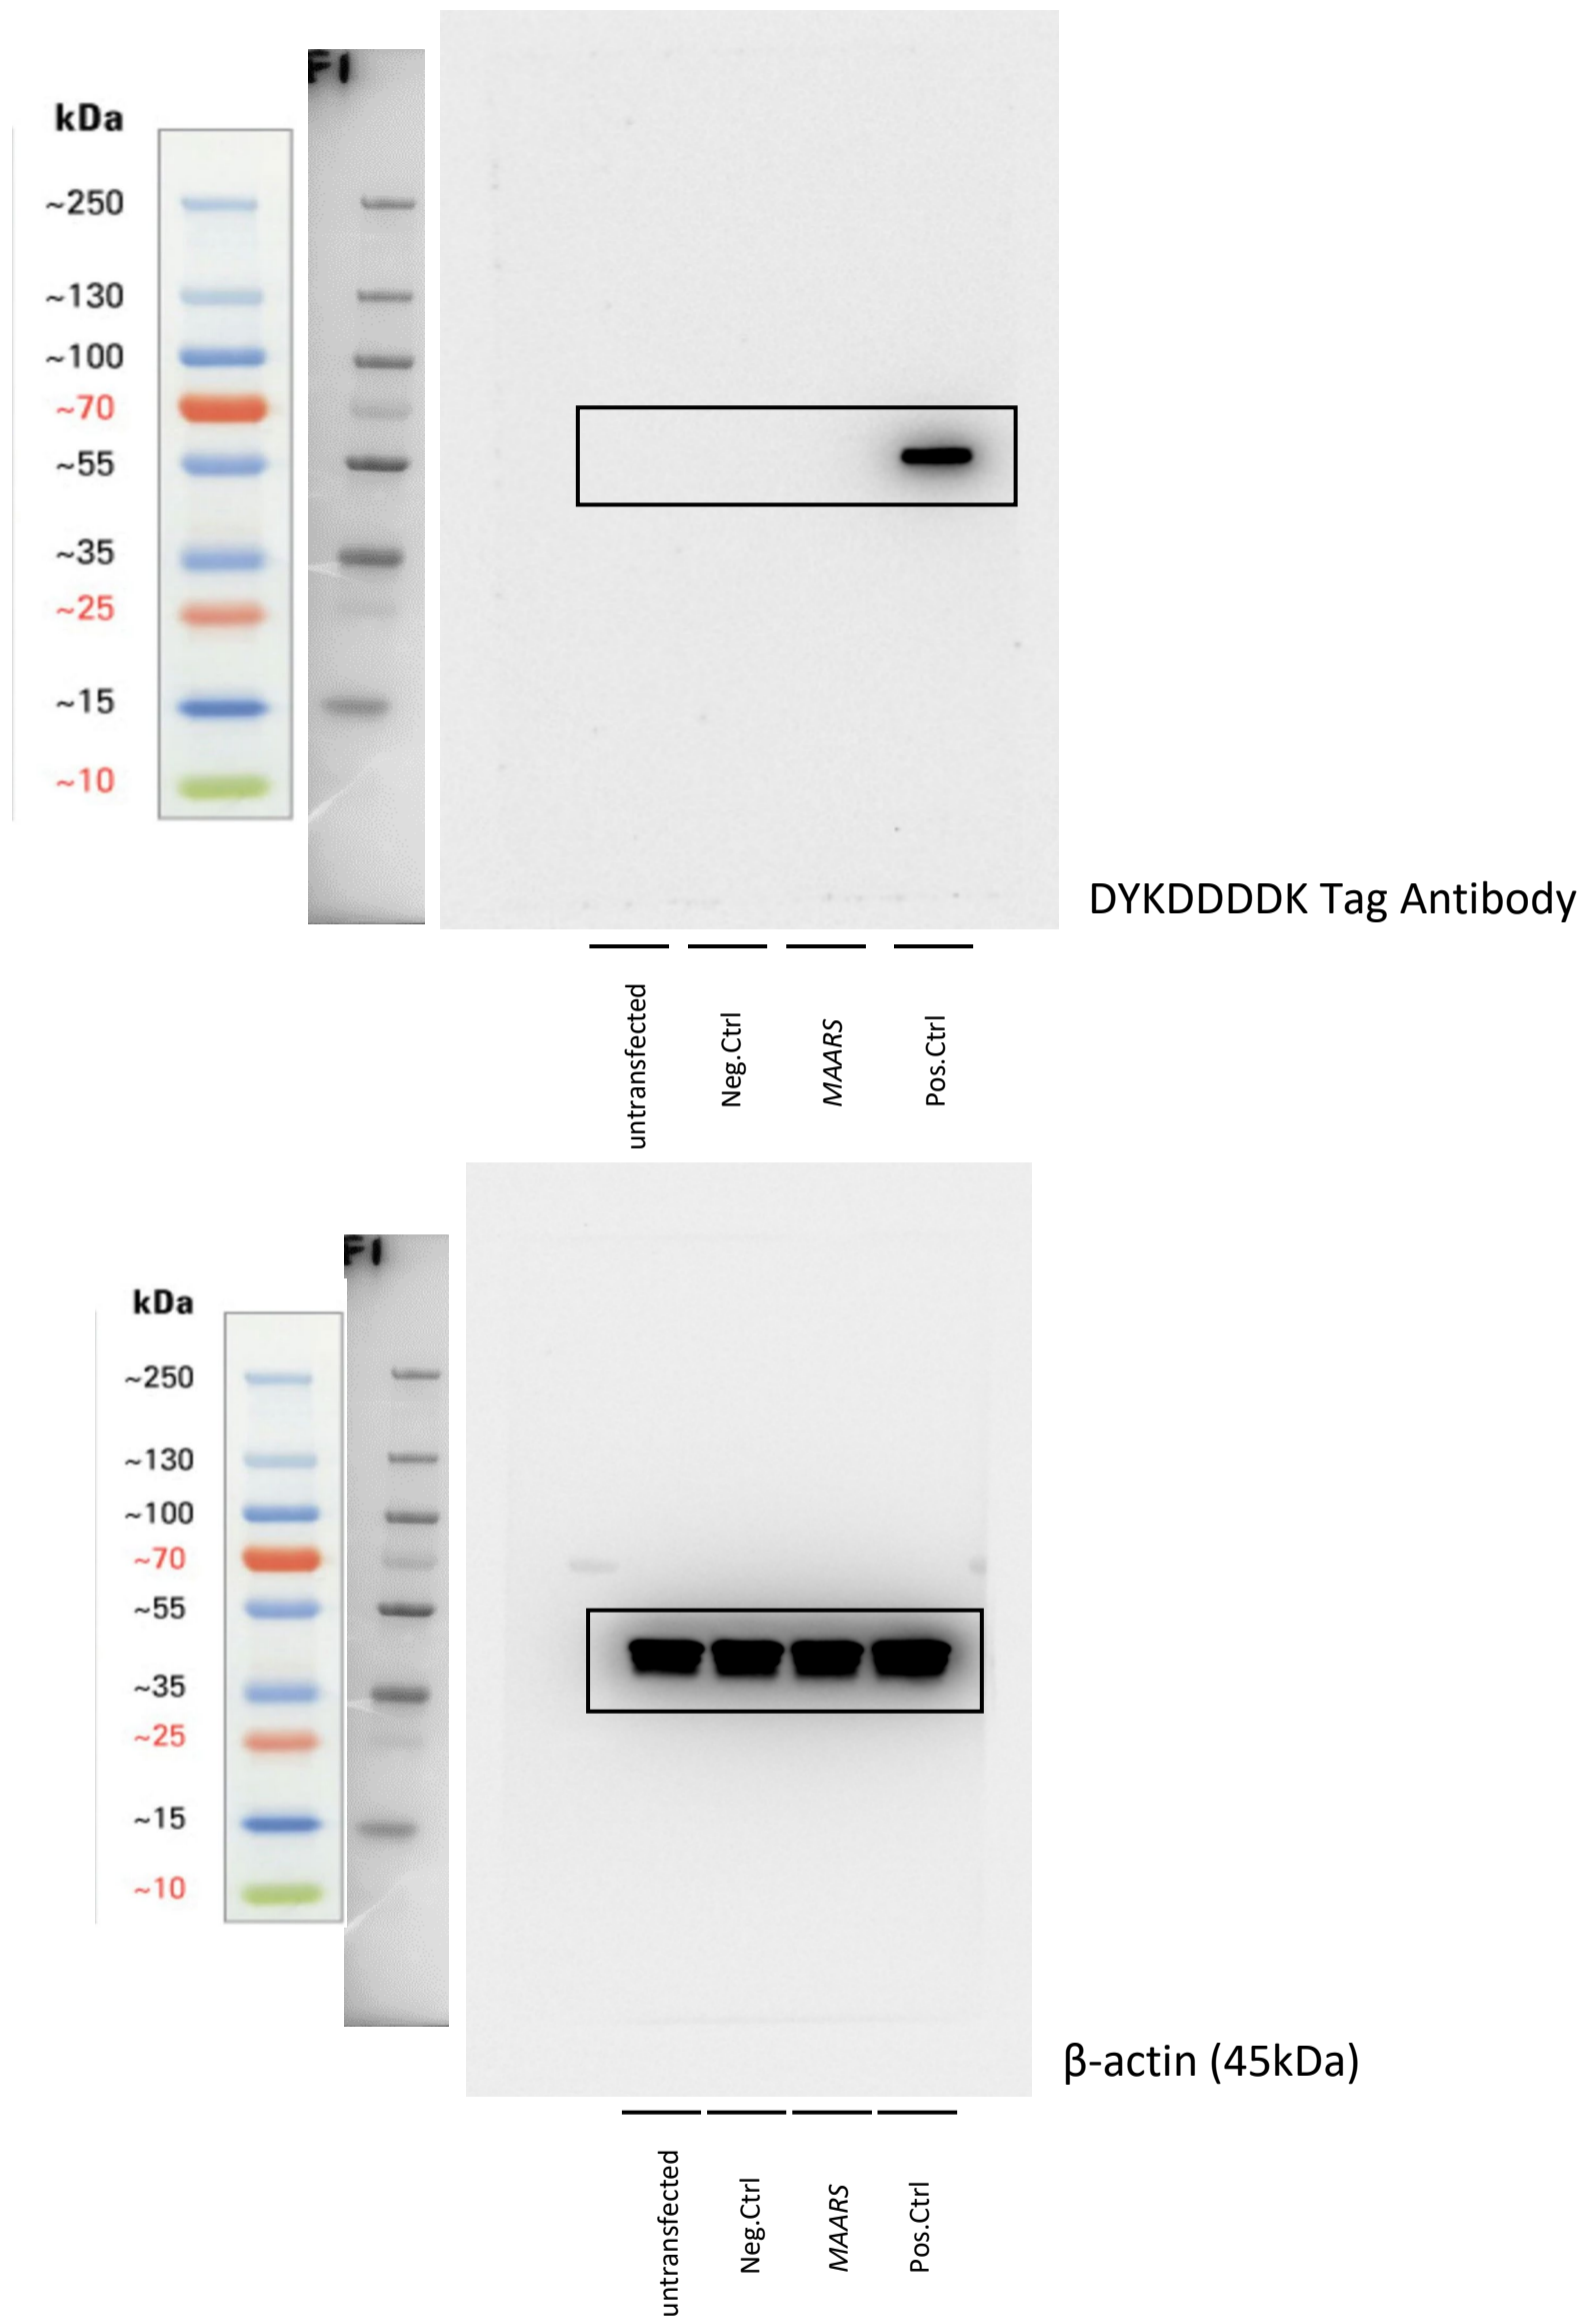

Fig. 3a

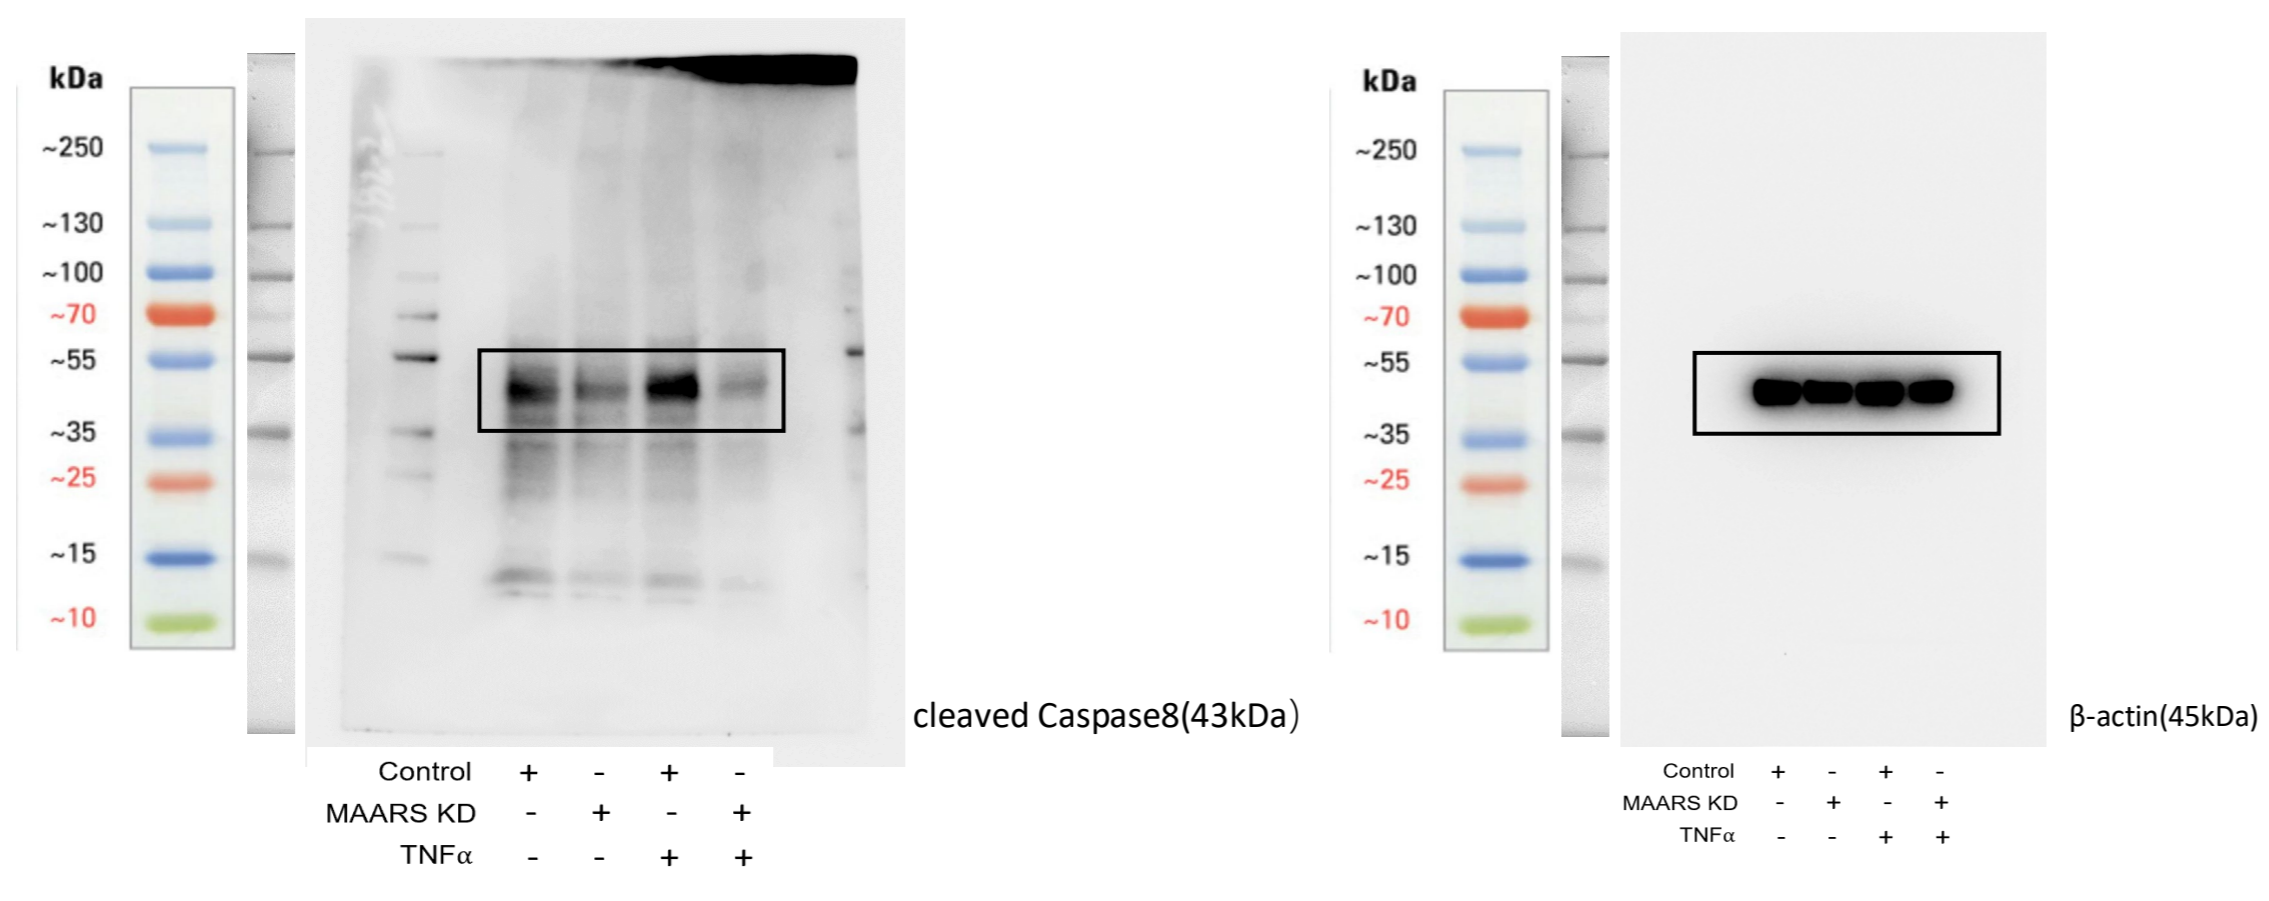

Fig. 3b

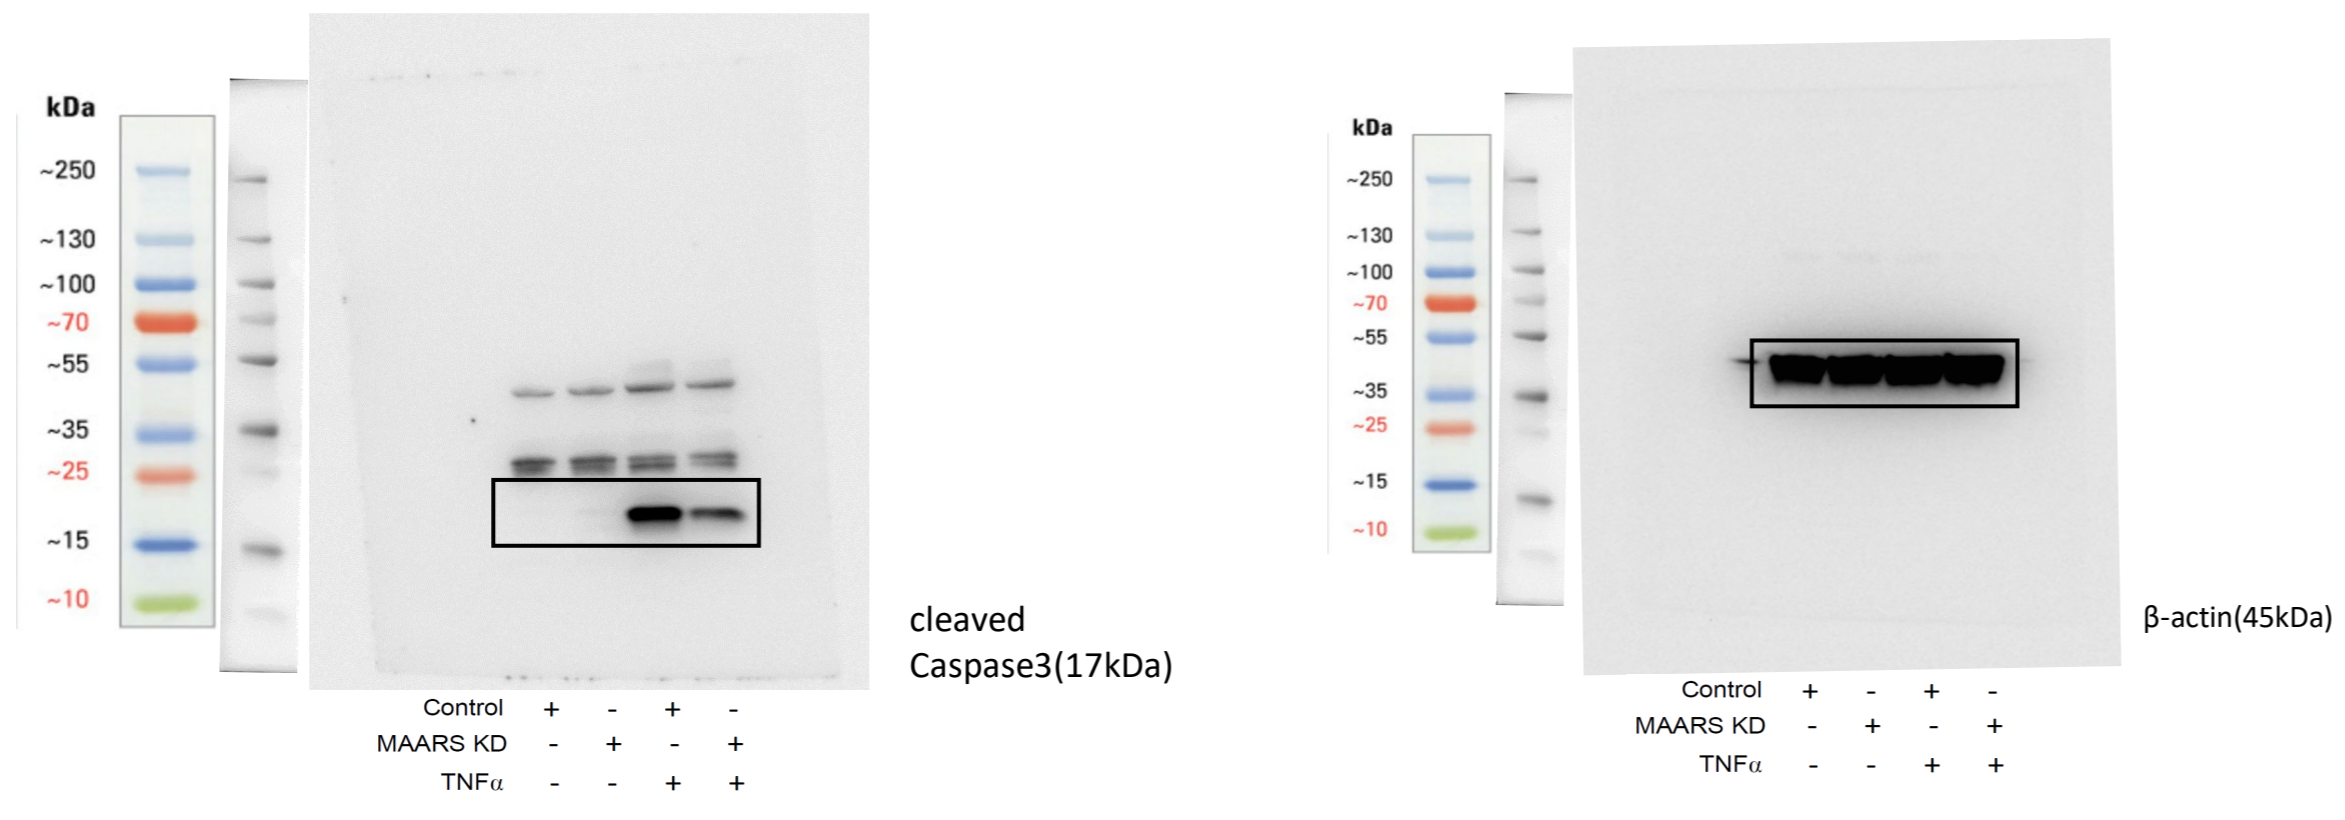

Fig. 3c

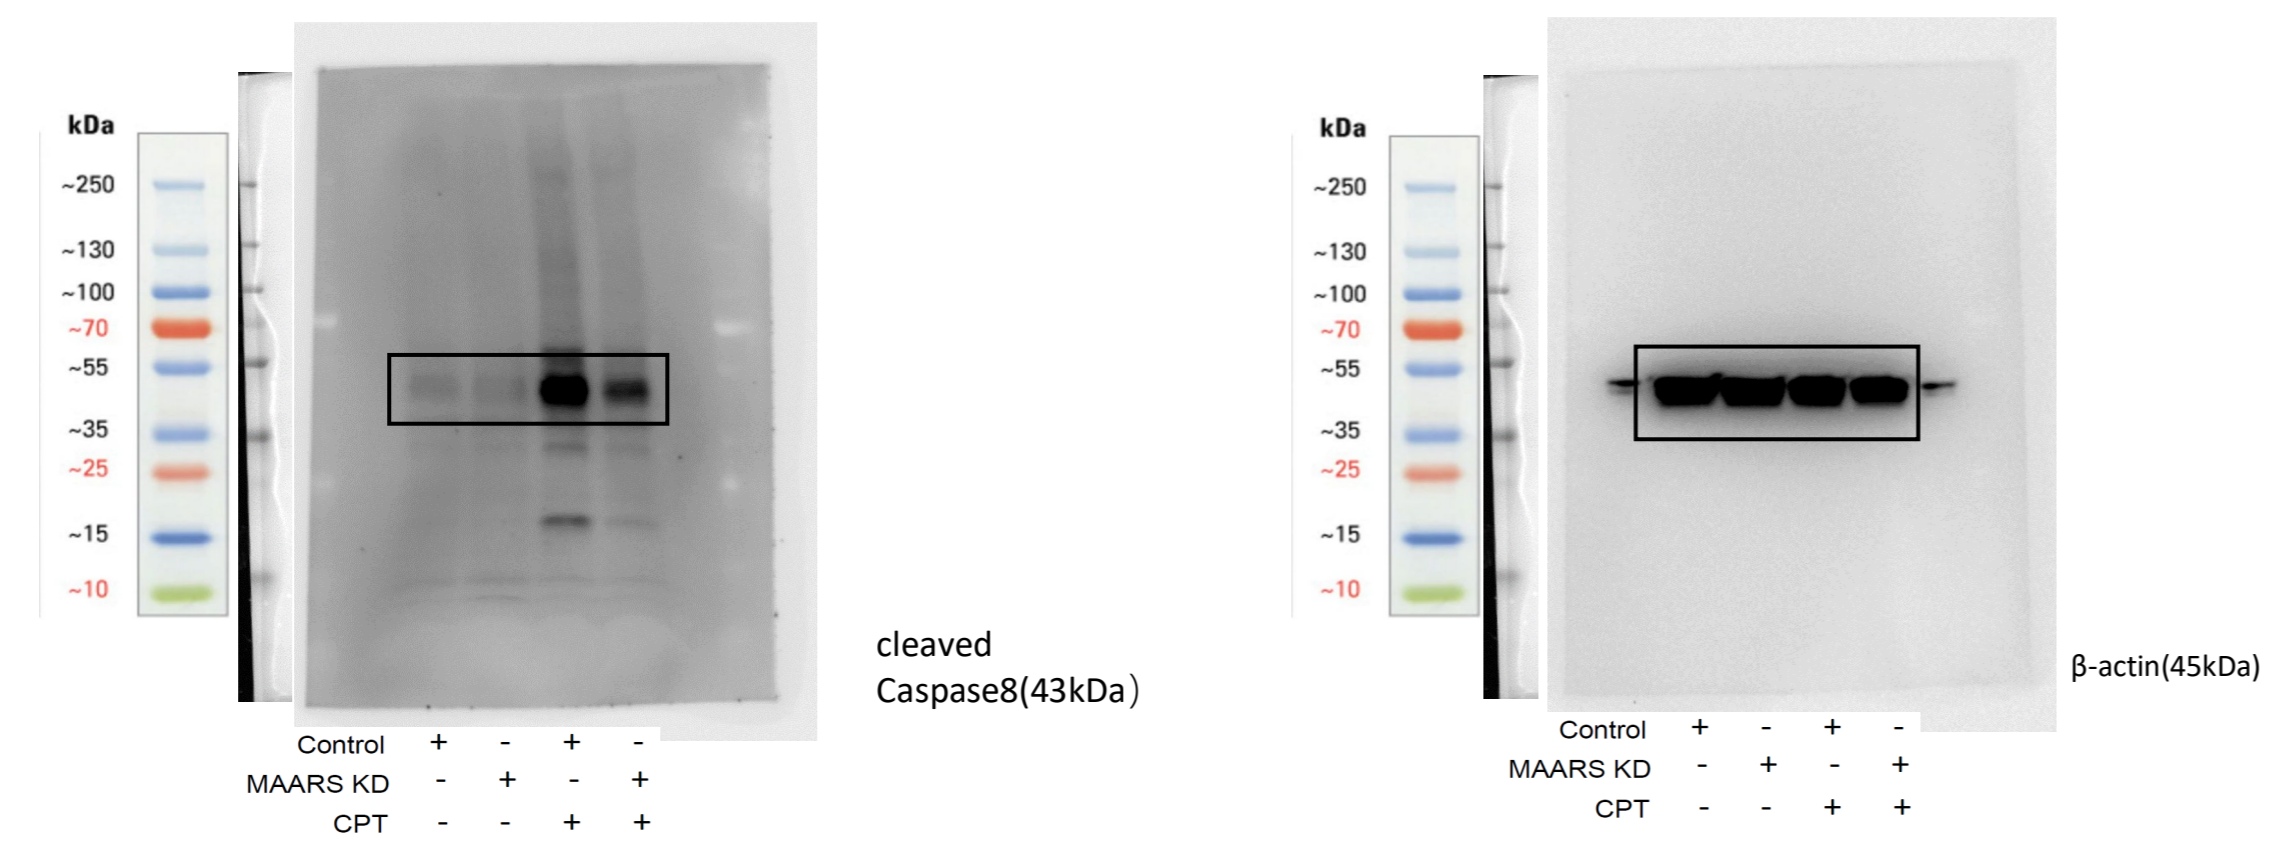

Fig. 3d

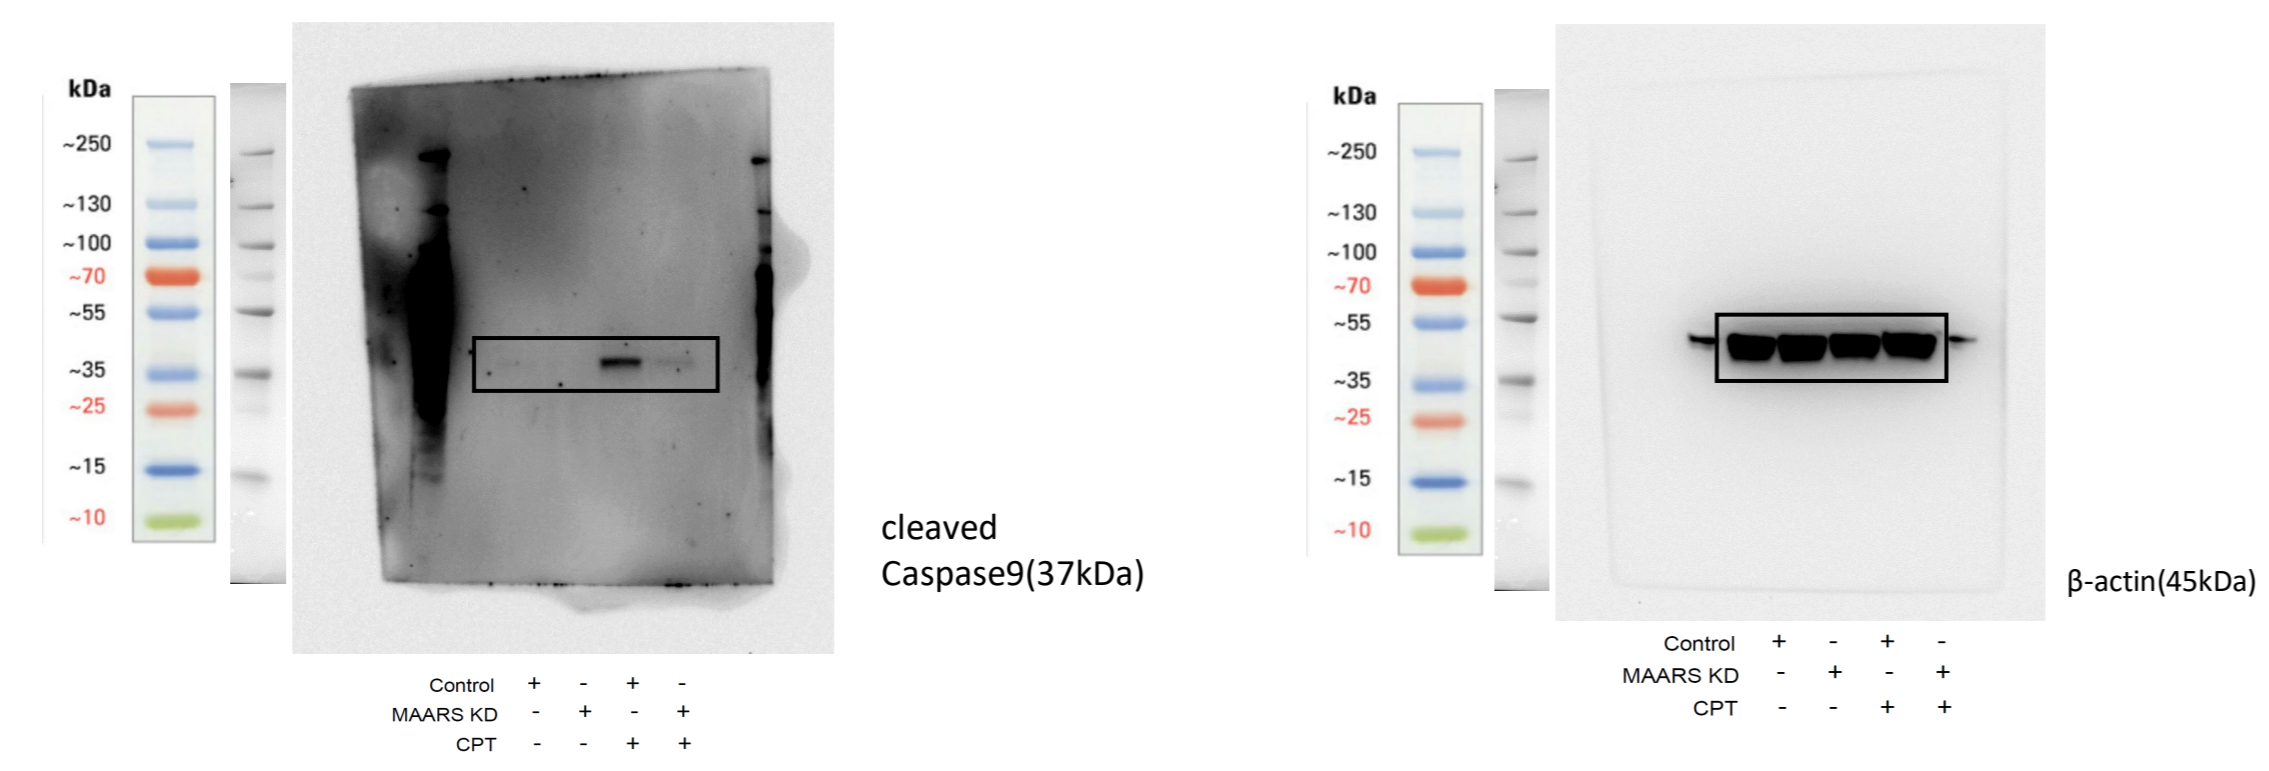

Fig. 3e

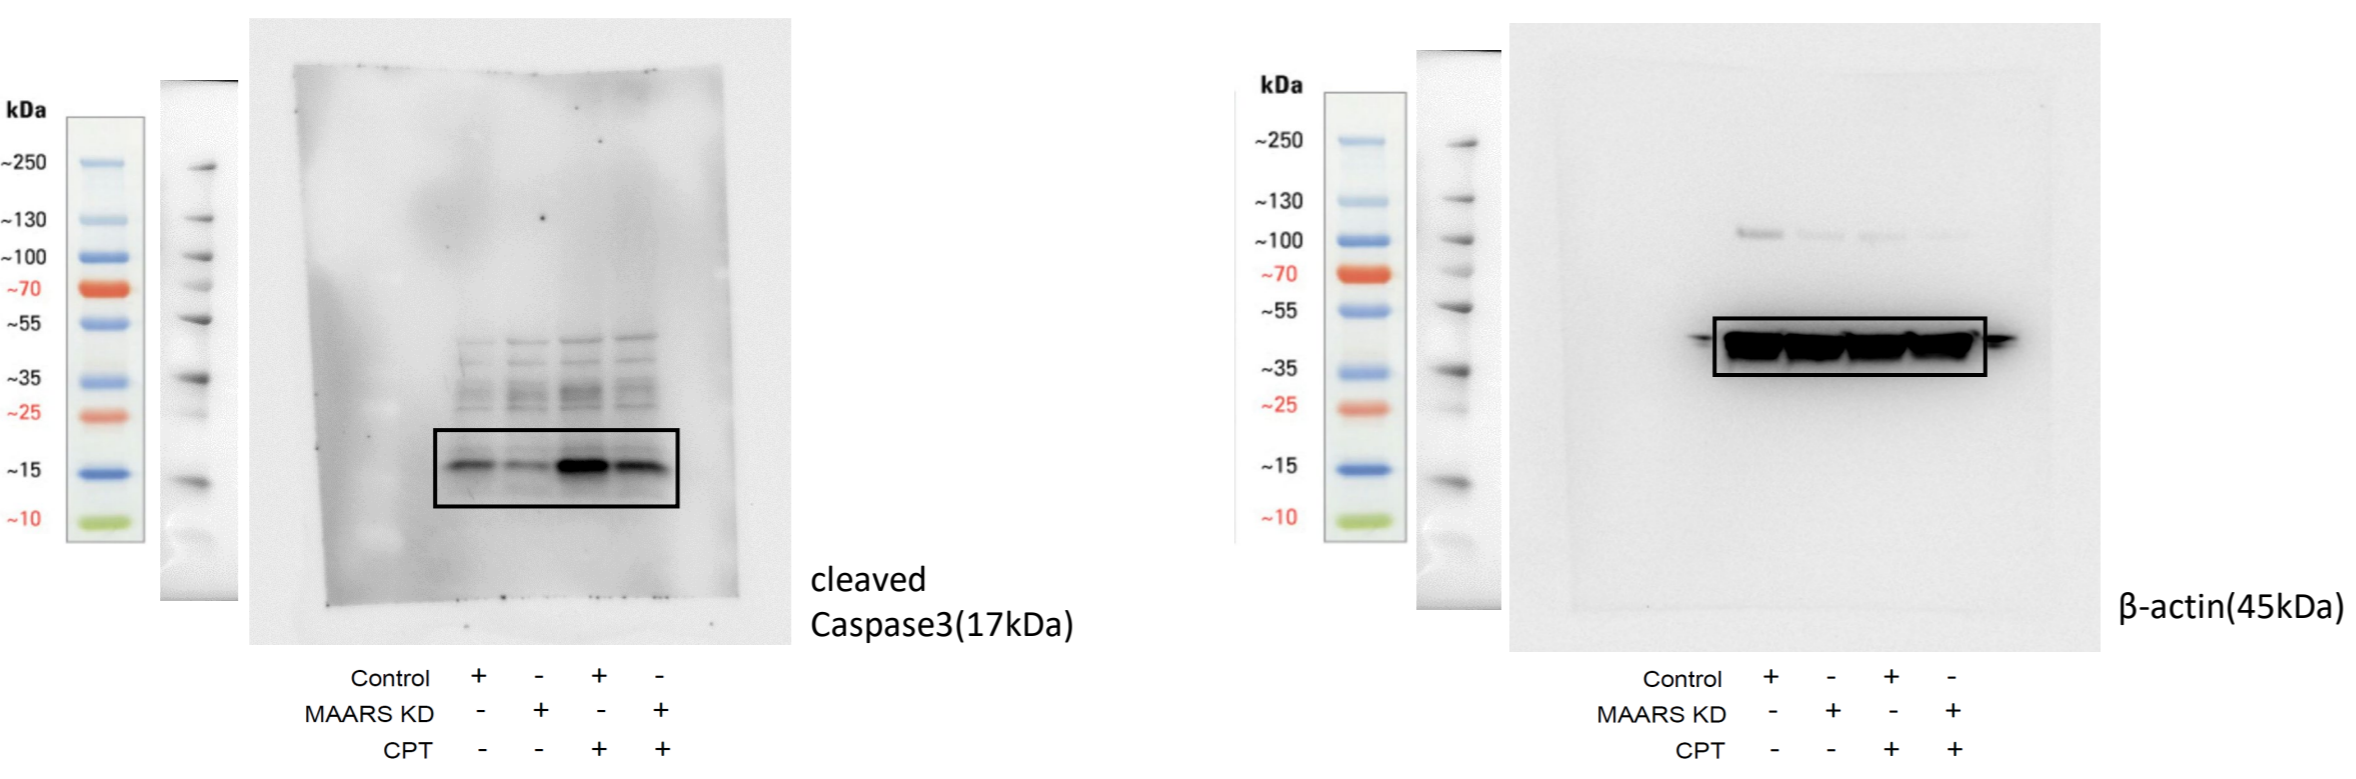

Fig. 3f-1

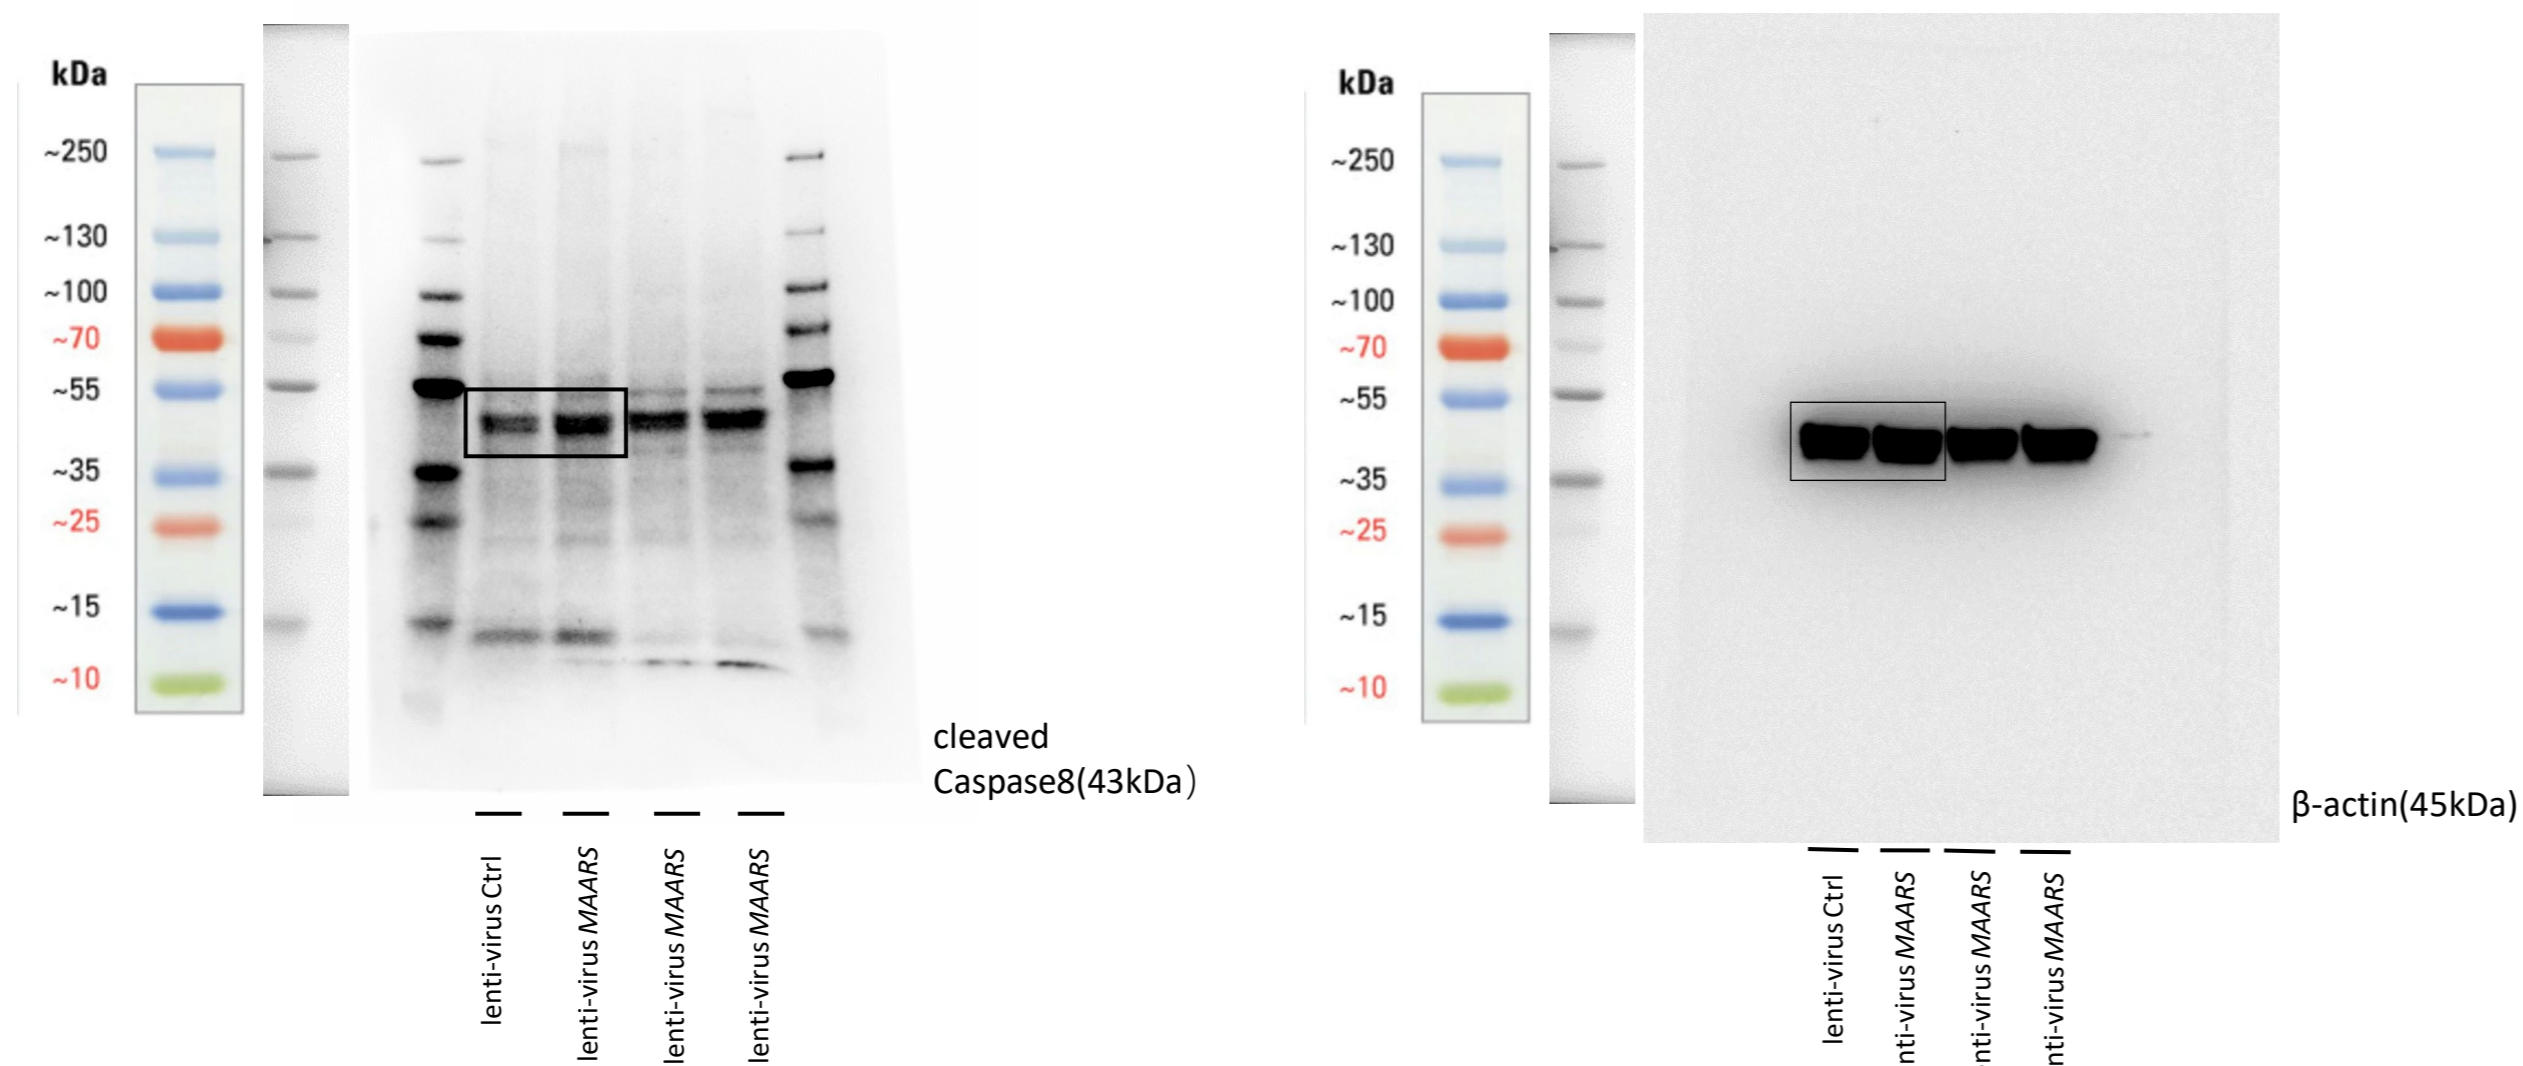

Fig. 3f-2

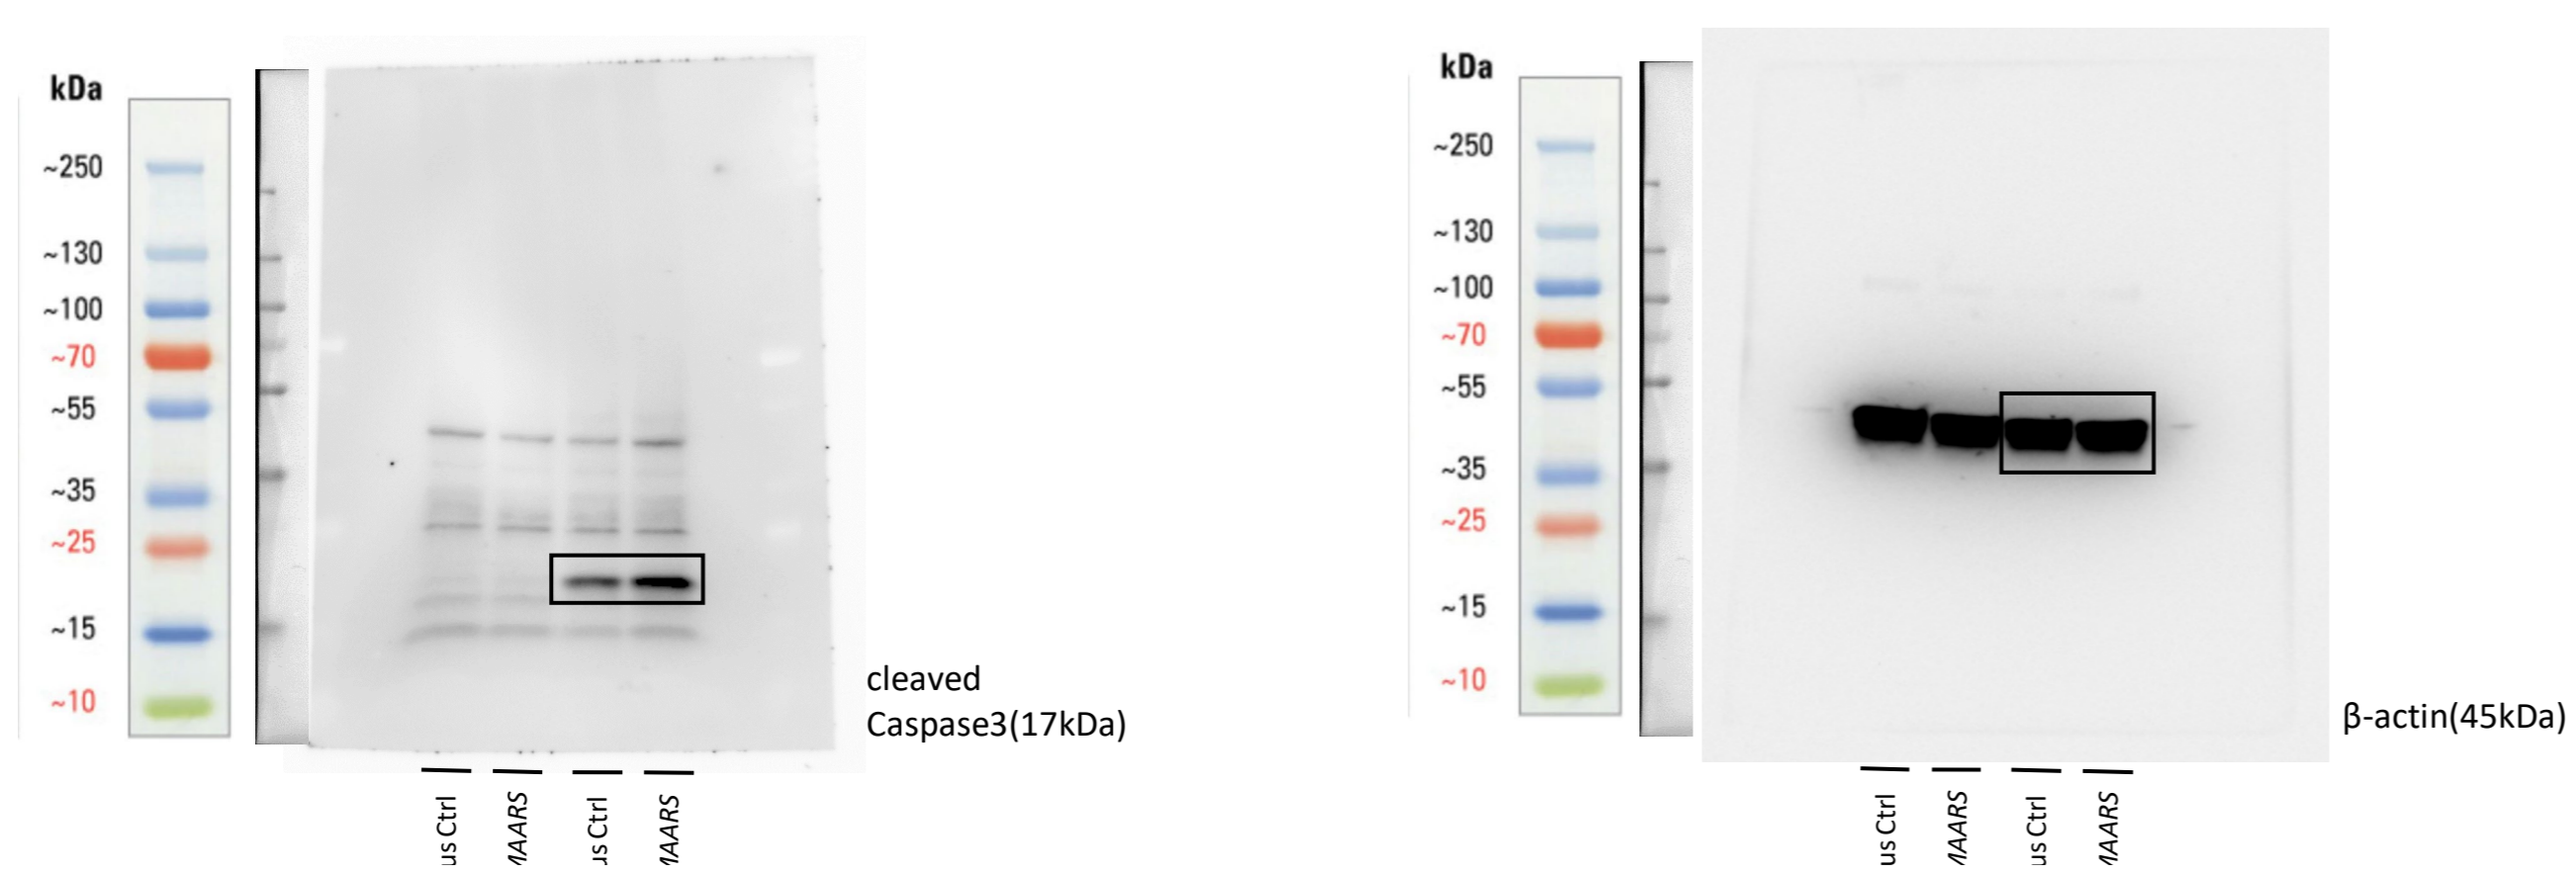

Fig. 4d

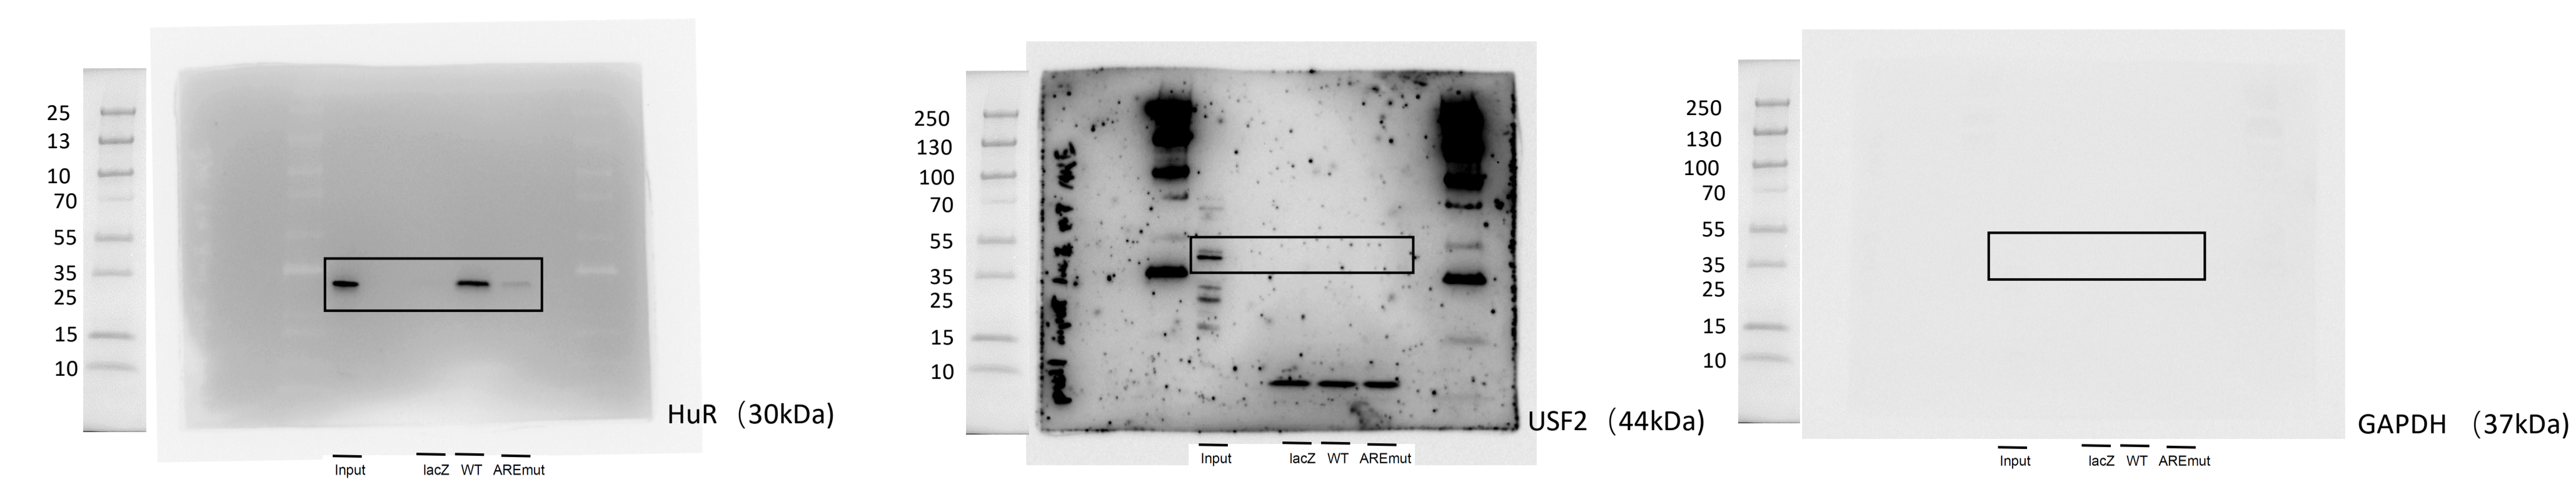

Fig. 4e

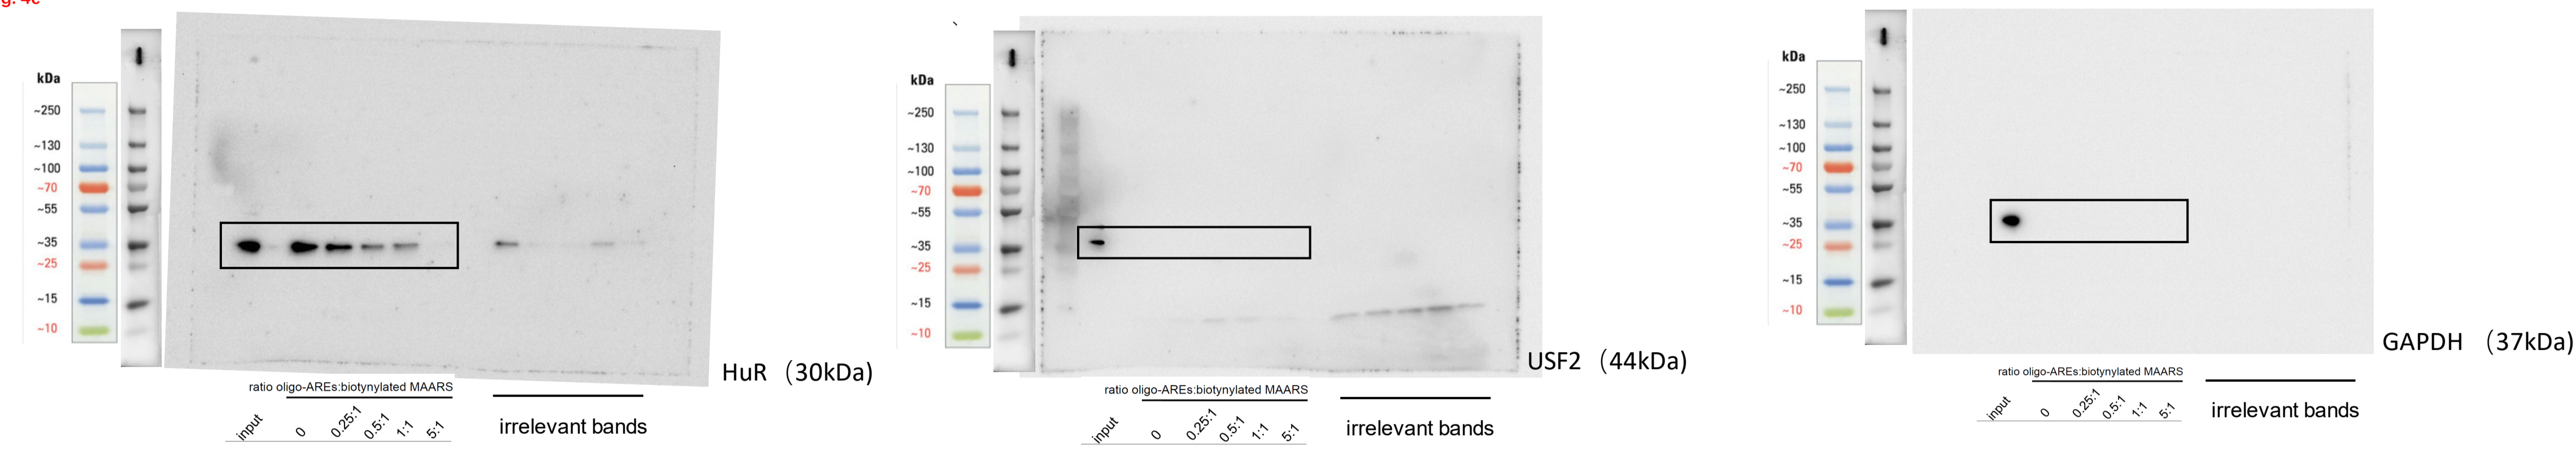

Fig. 4f

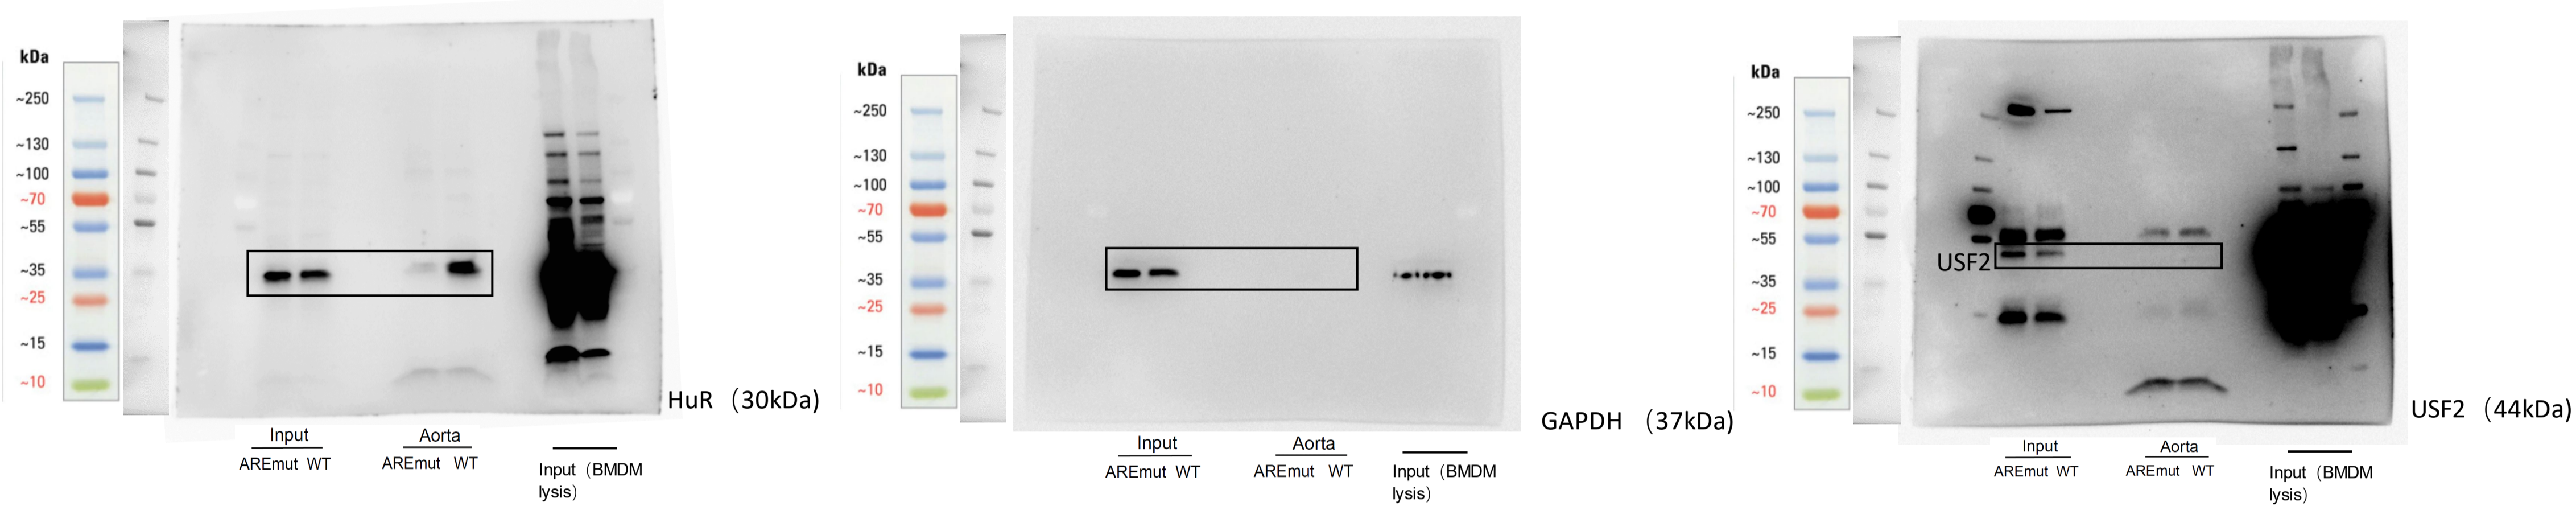

Fig. 4g

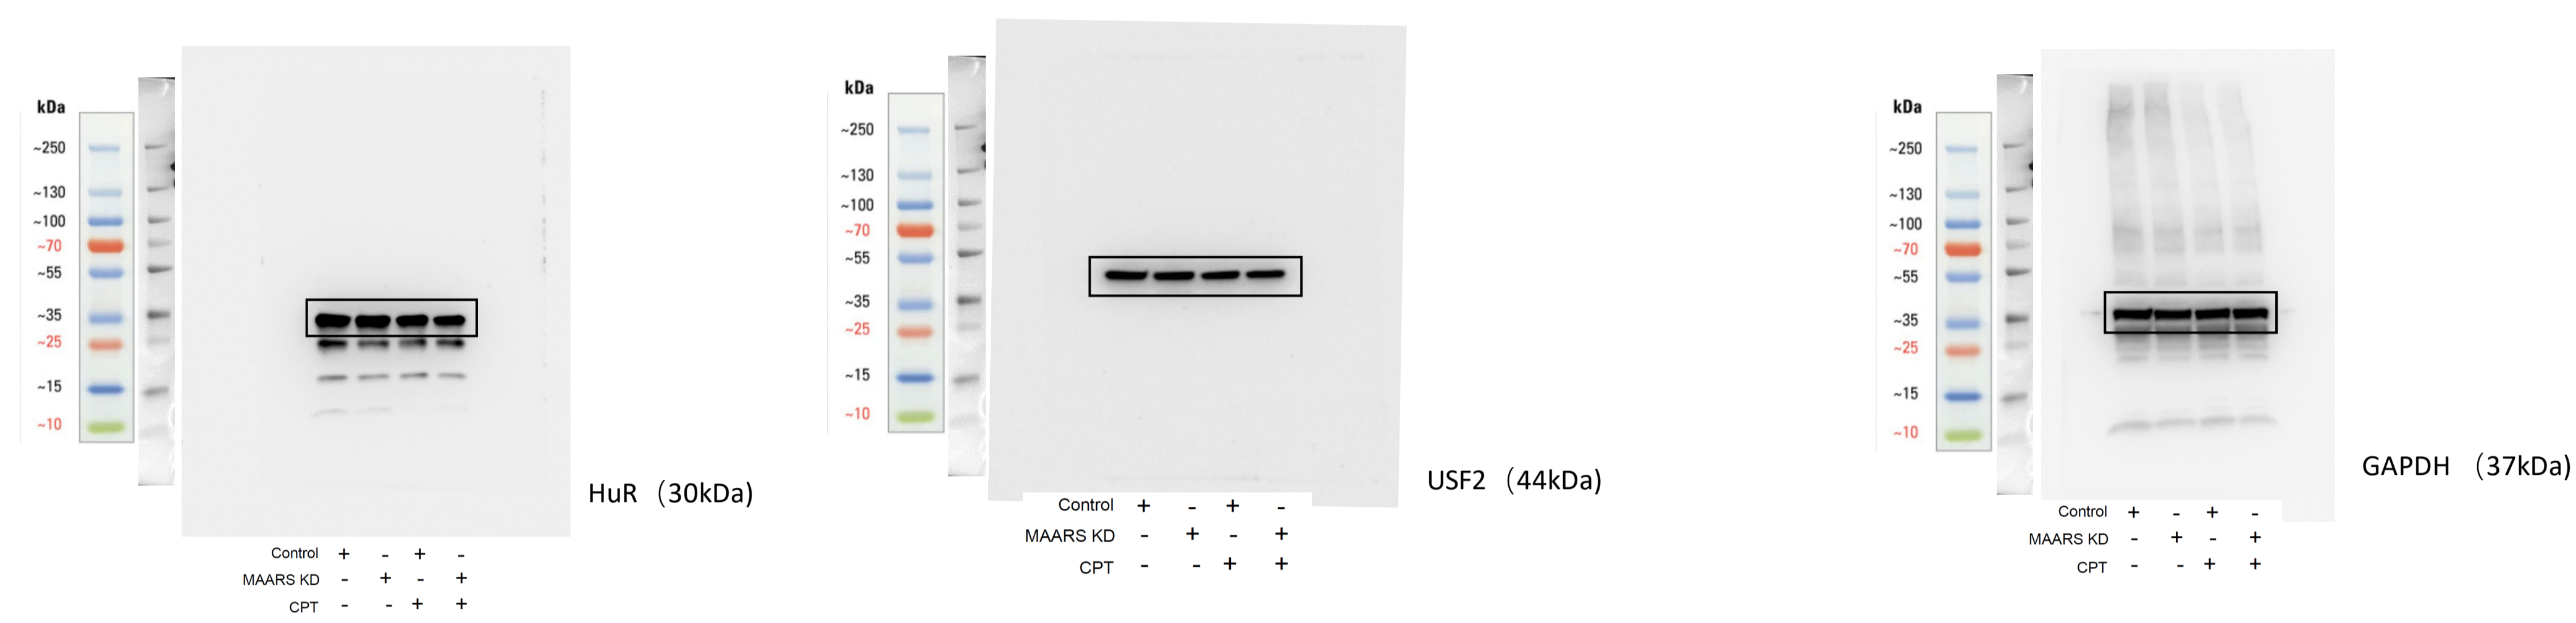

Fig. 4h

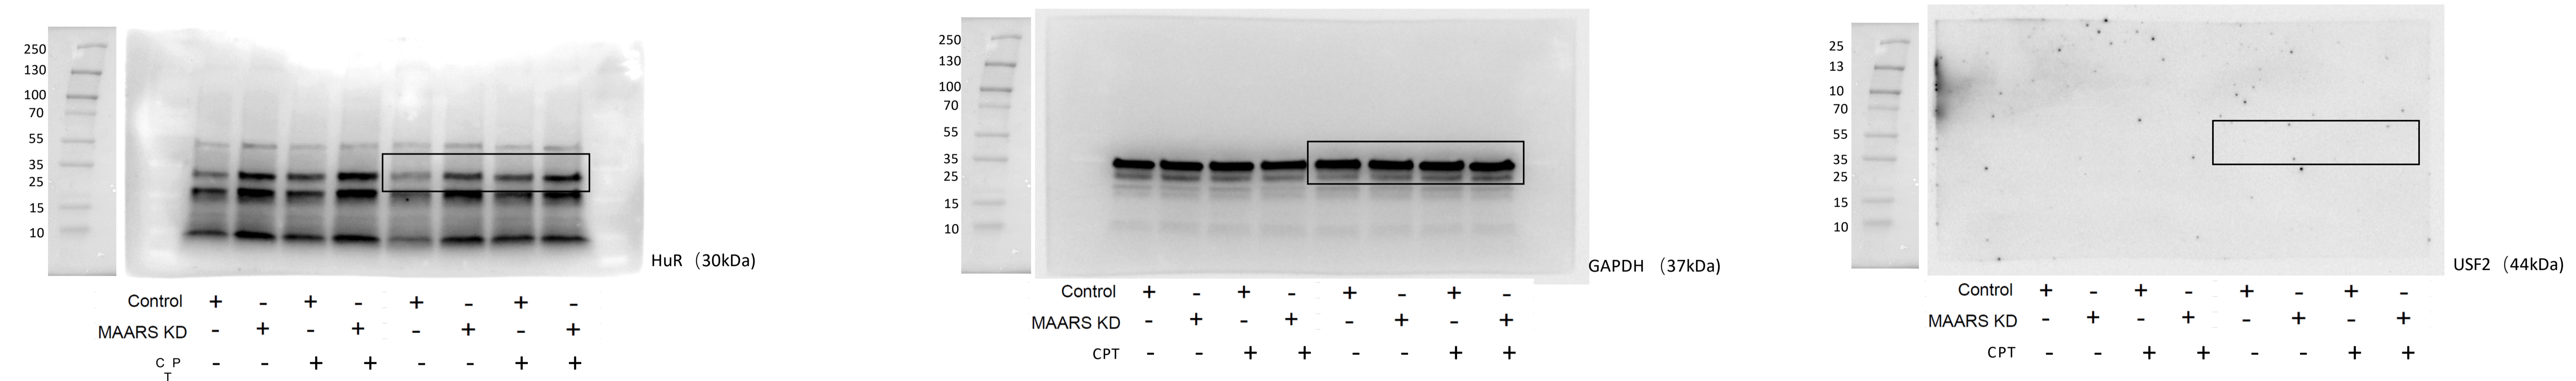

Fig. 4i

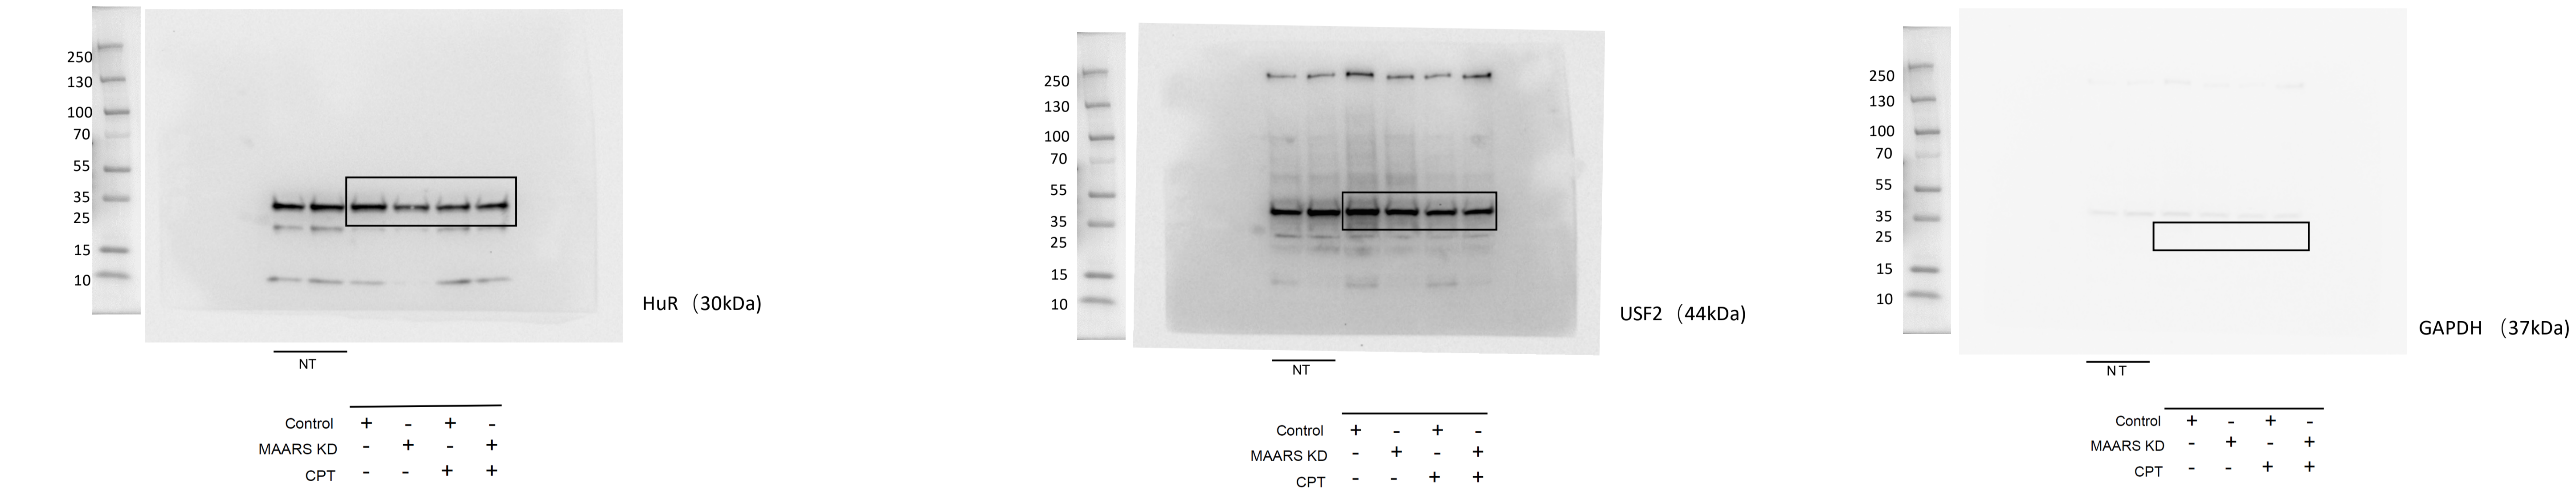

Fig. 5f

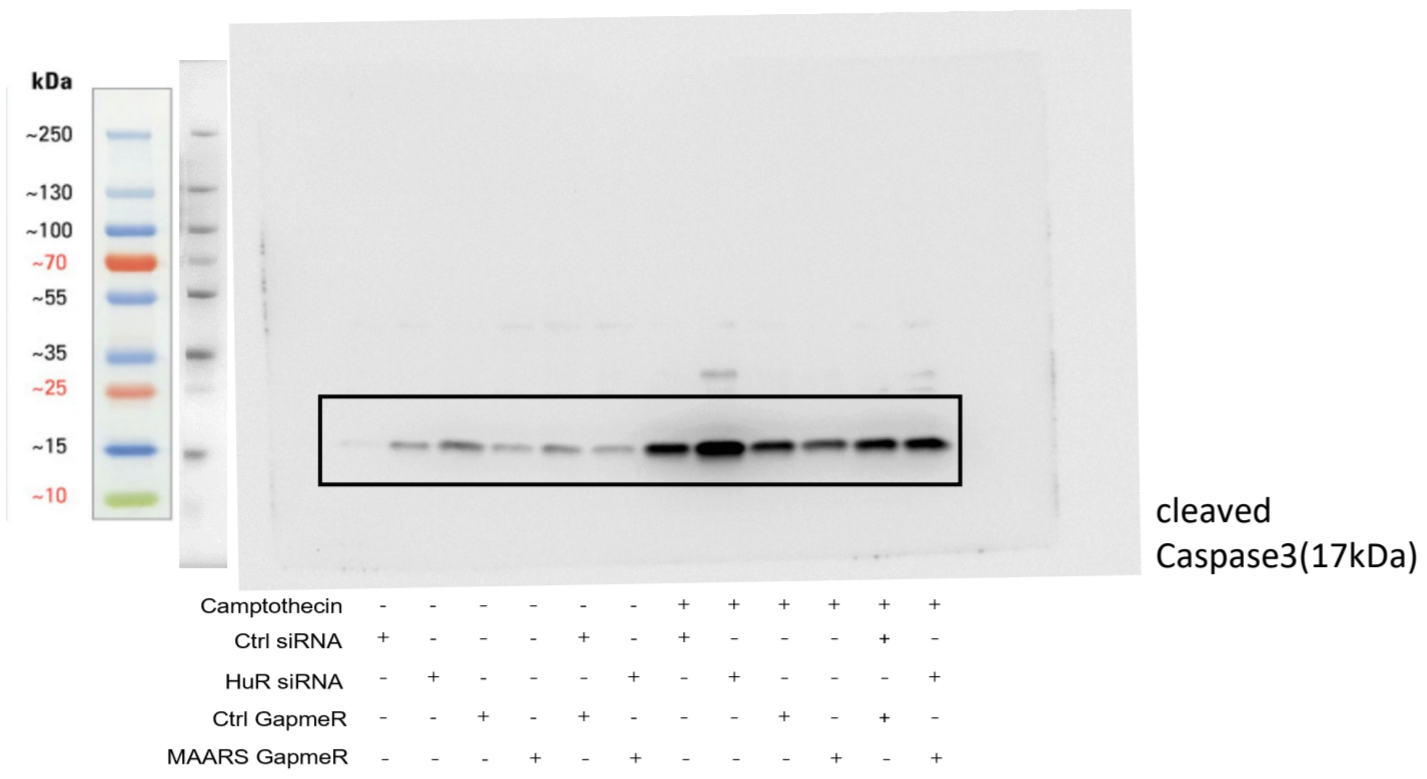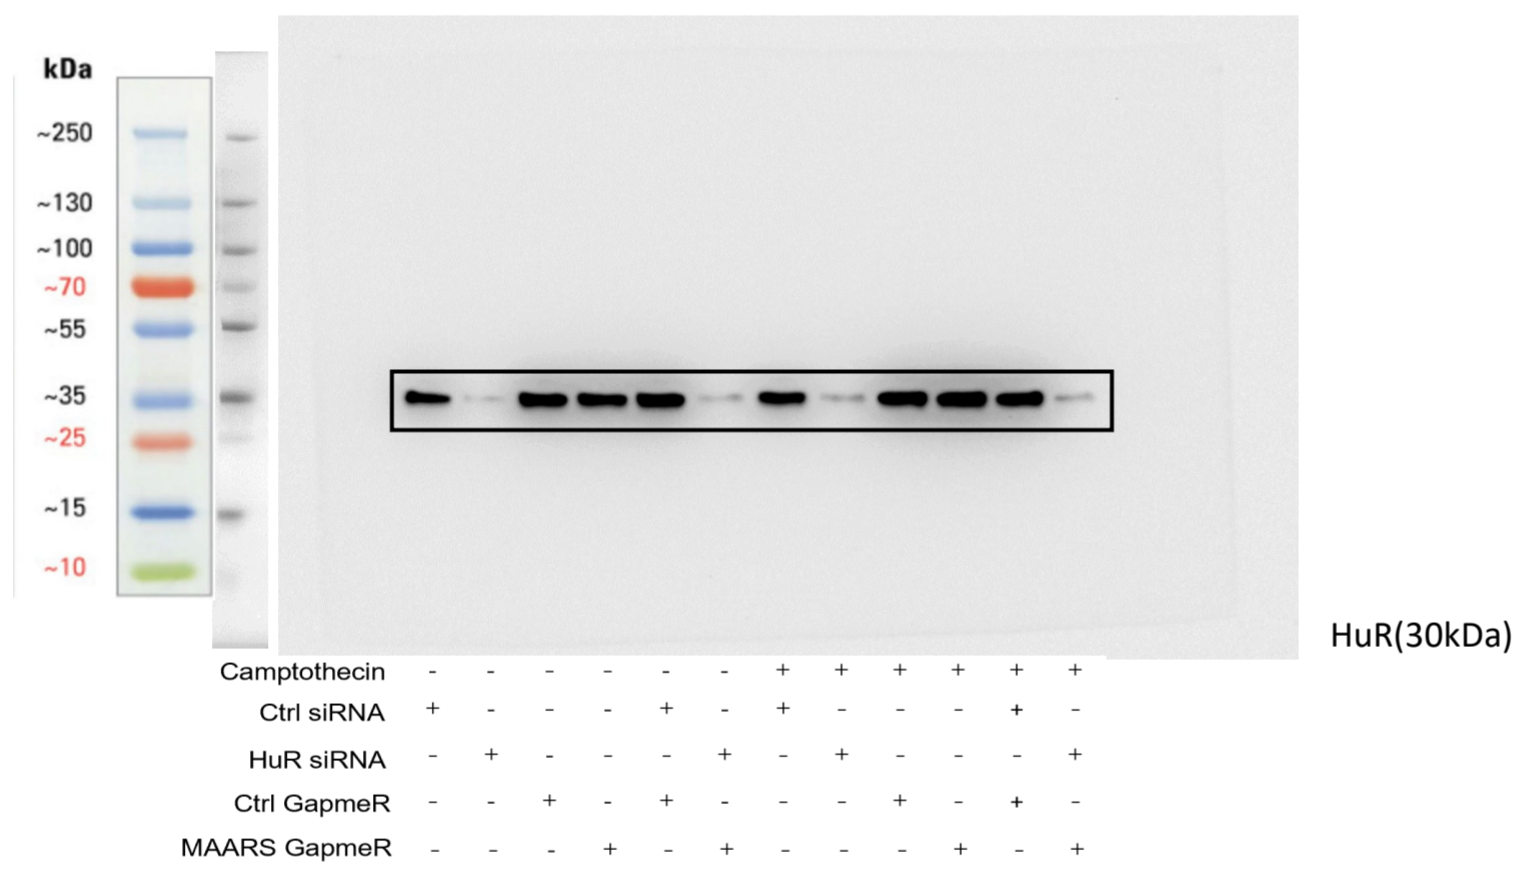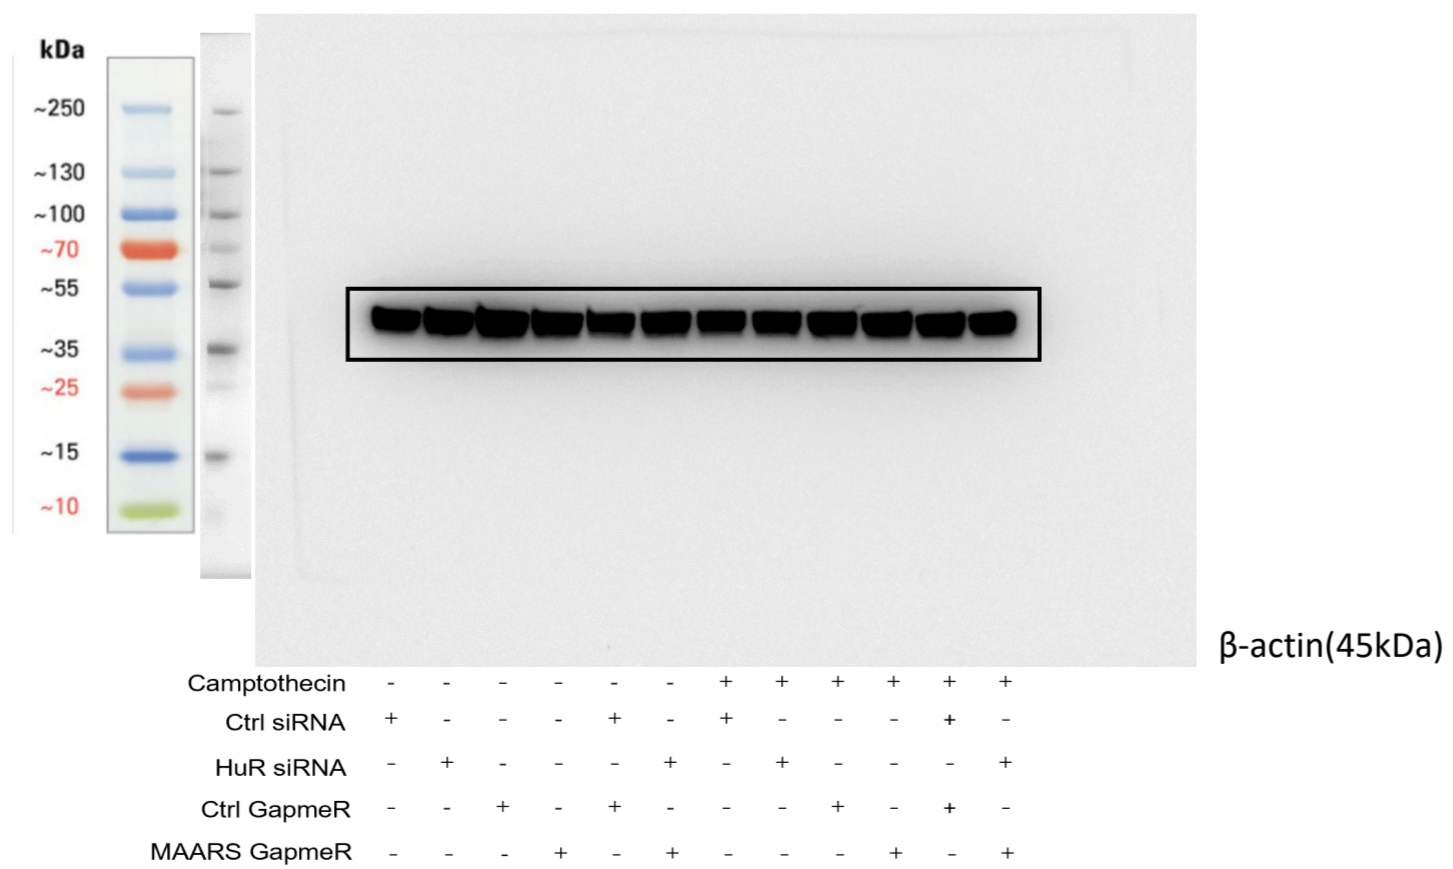

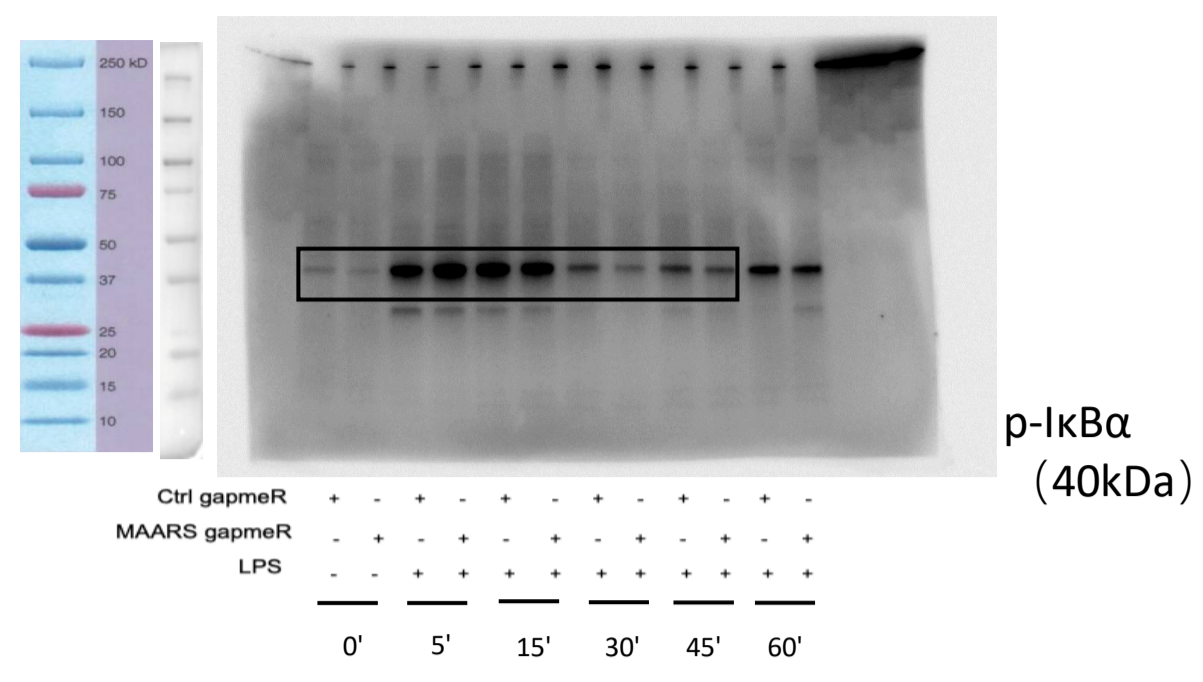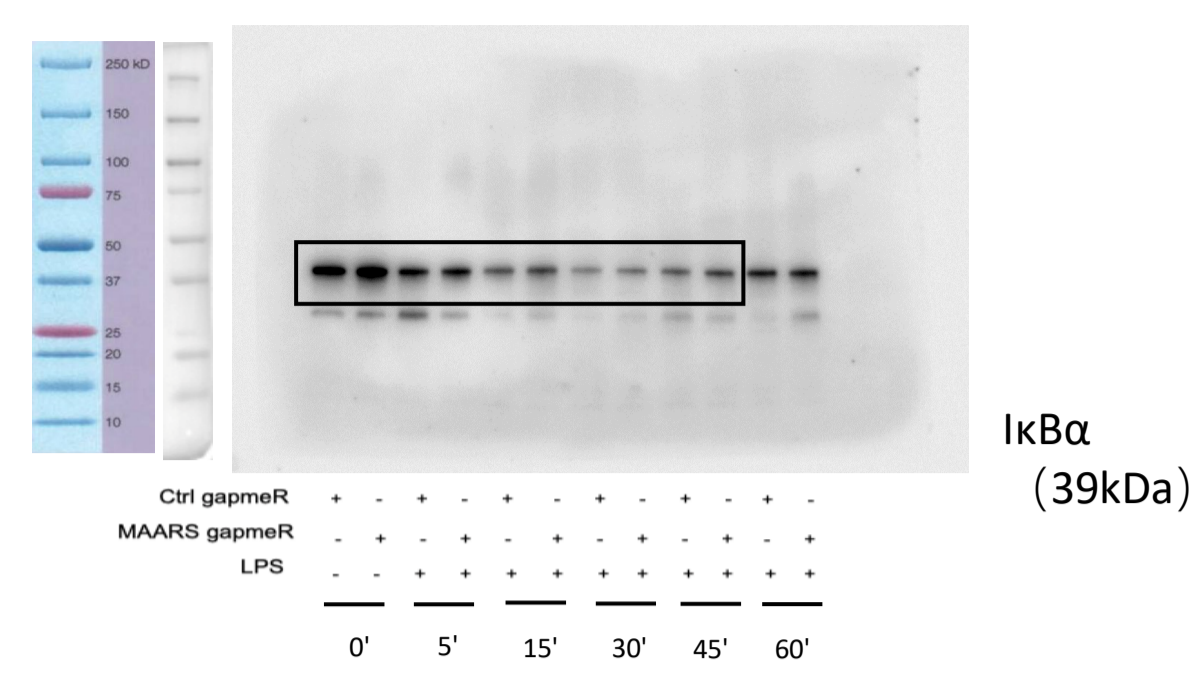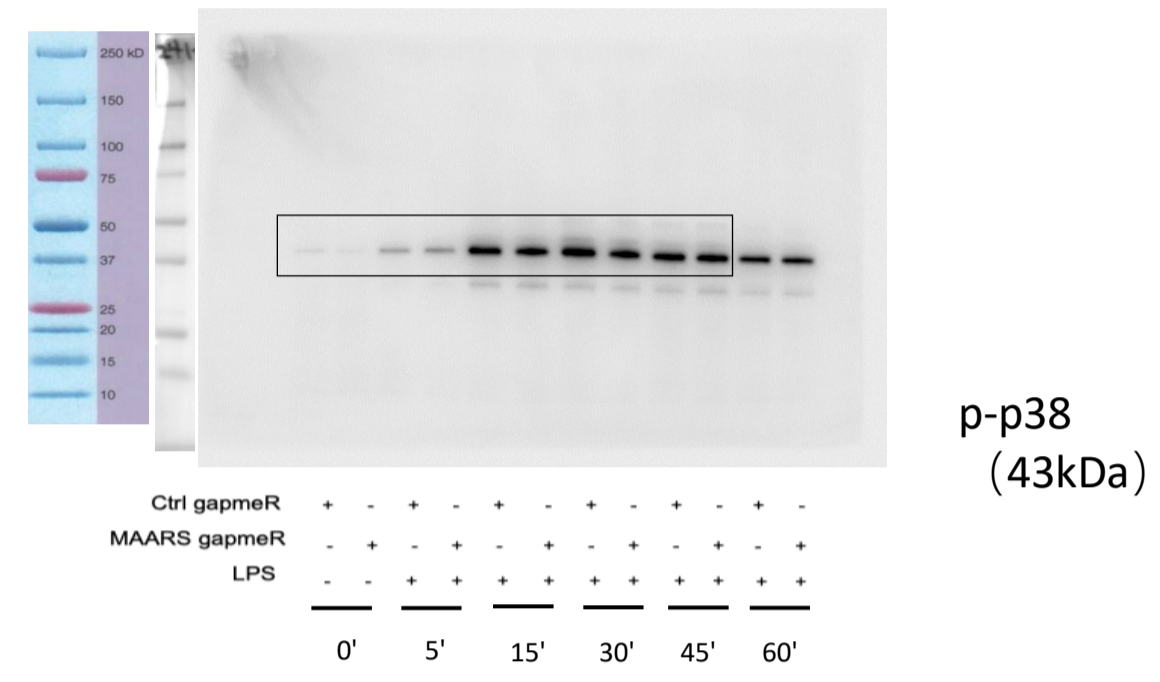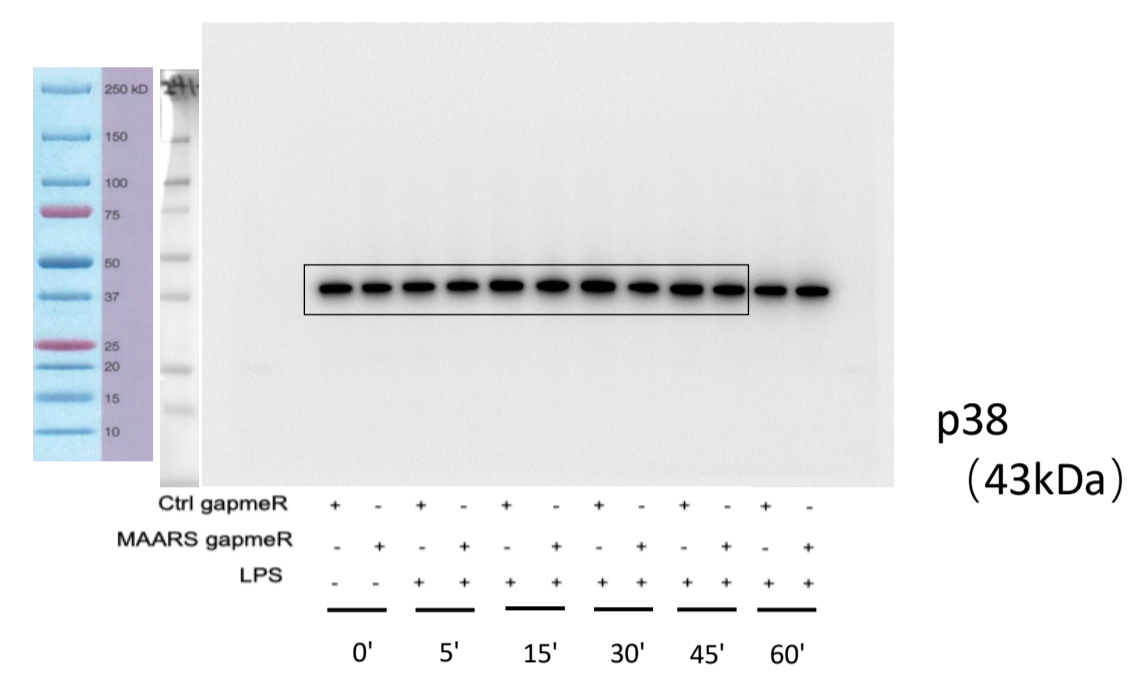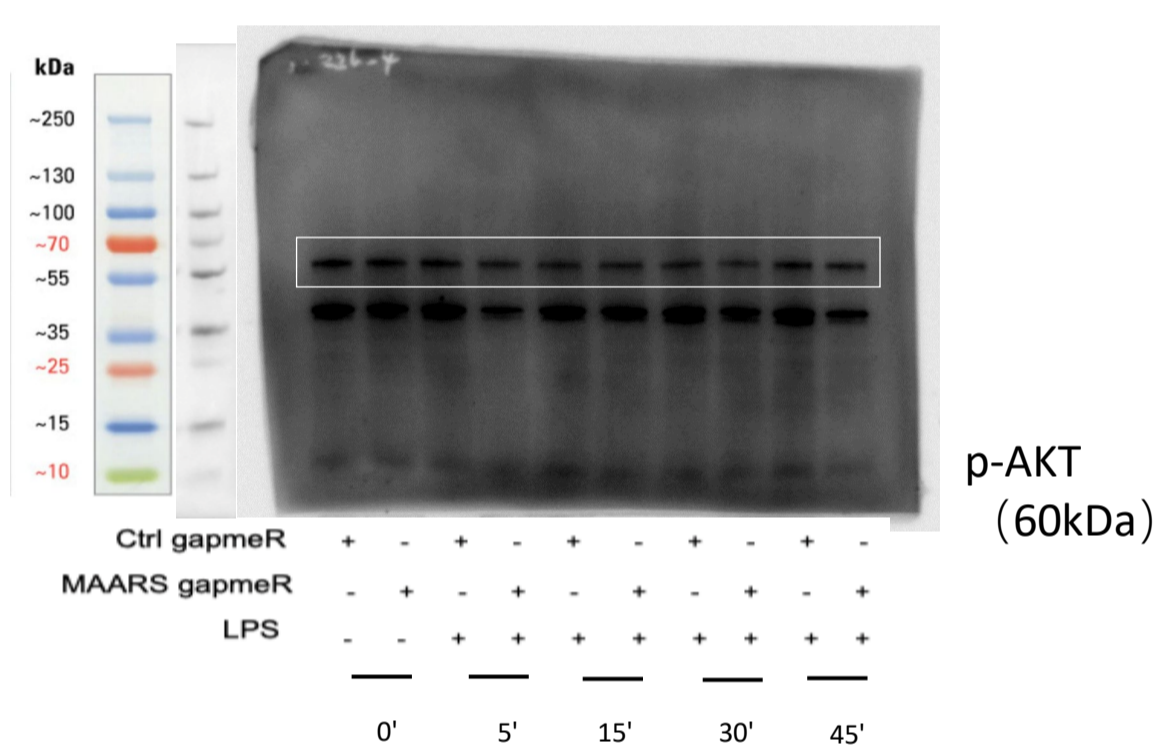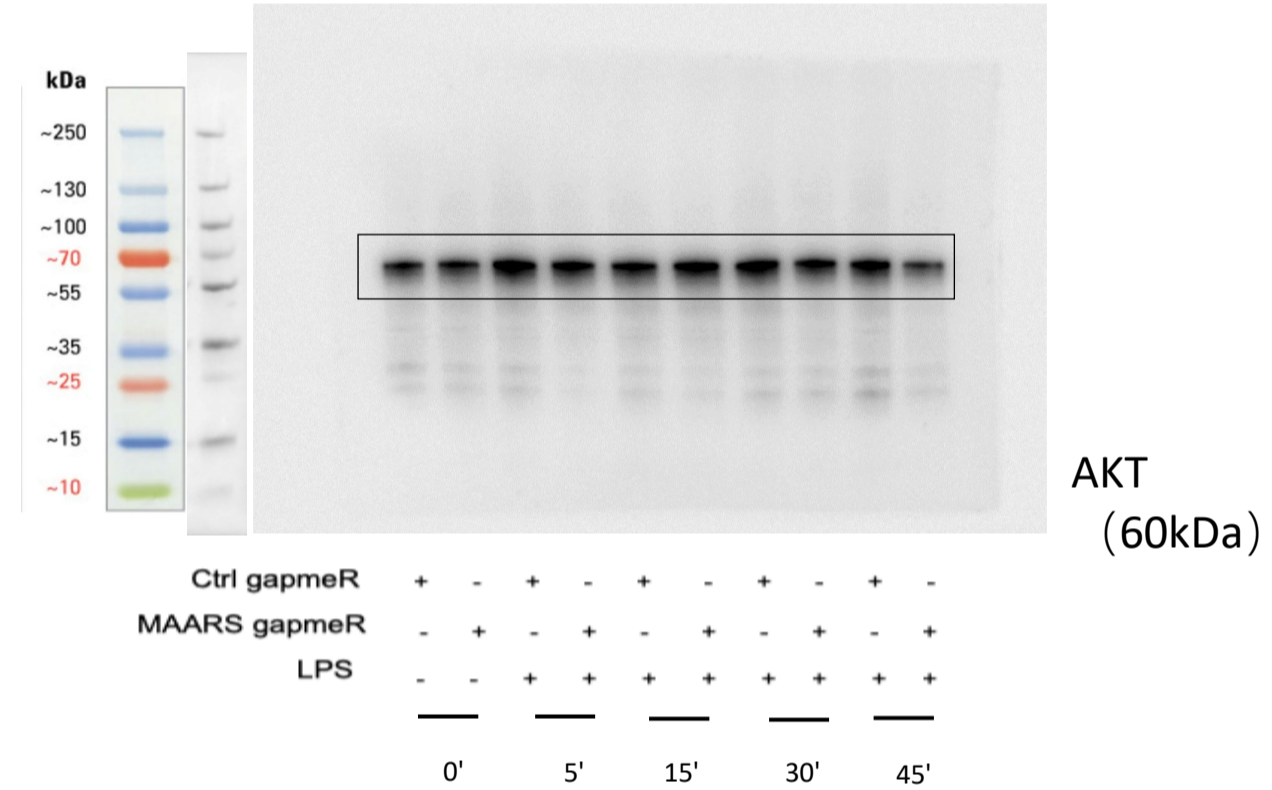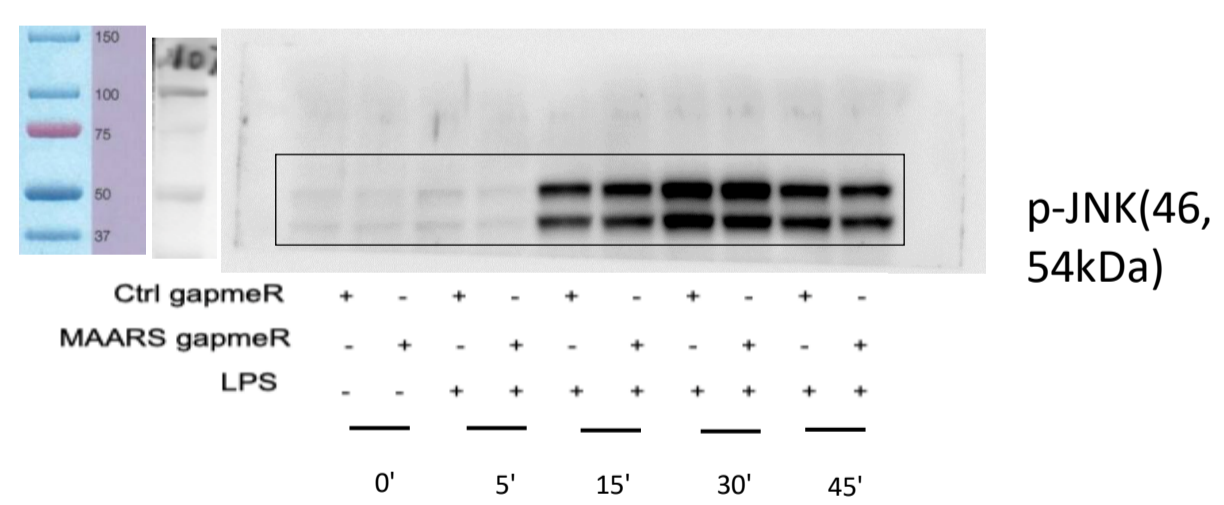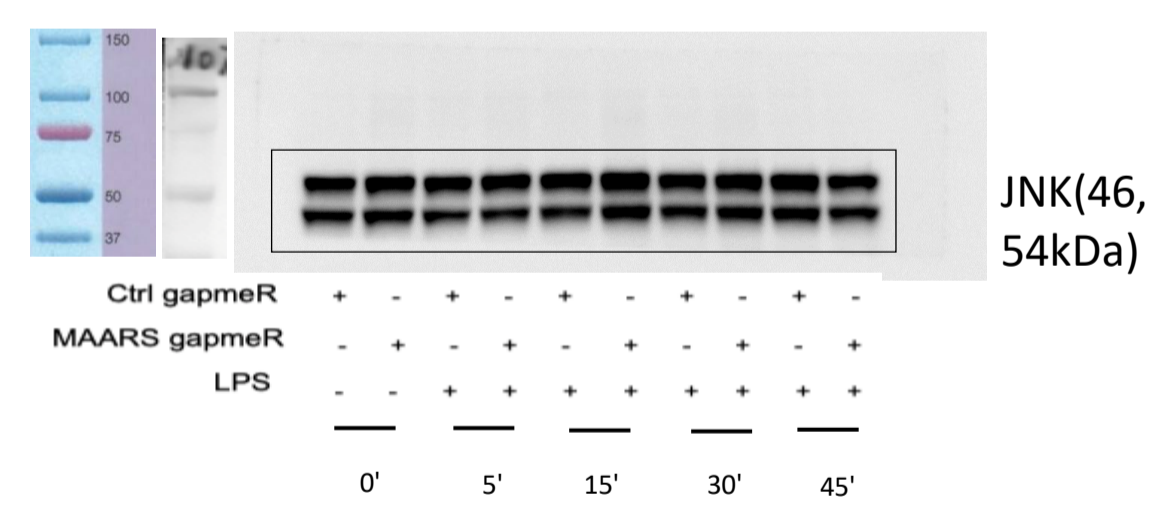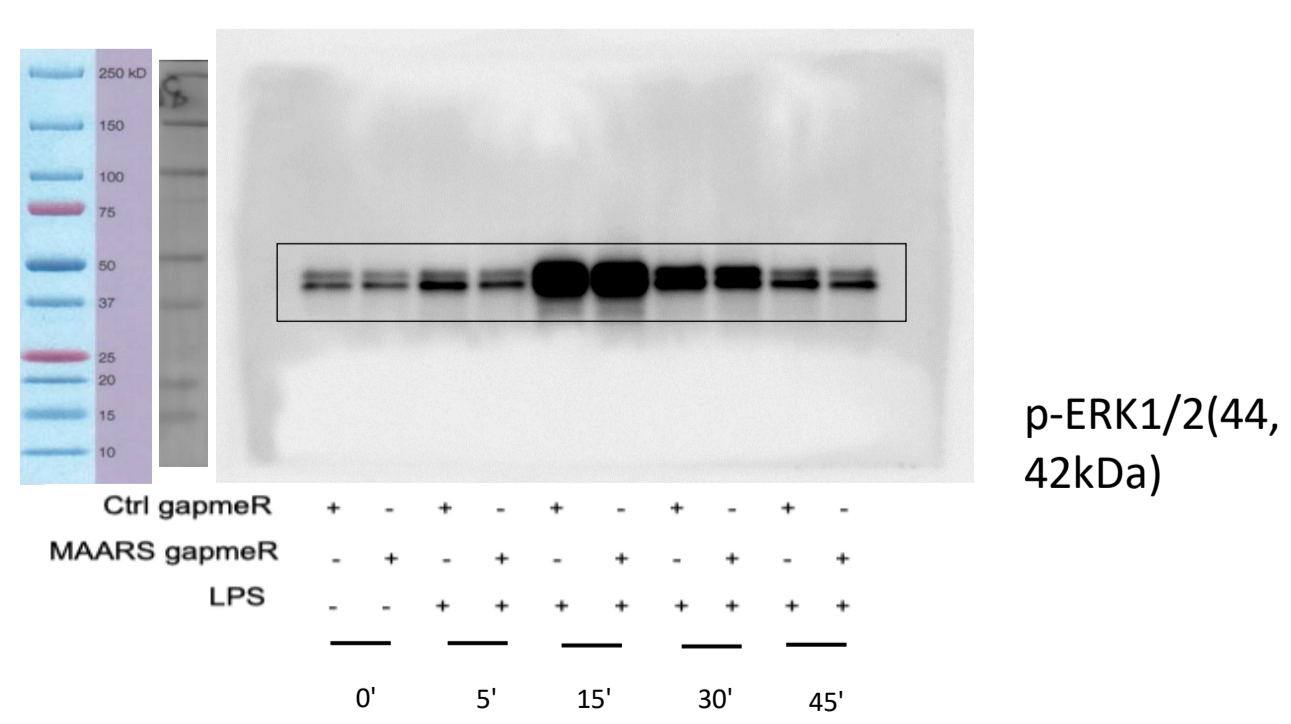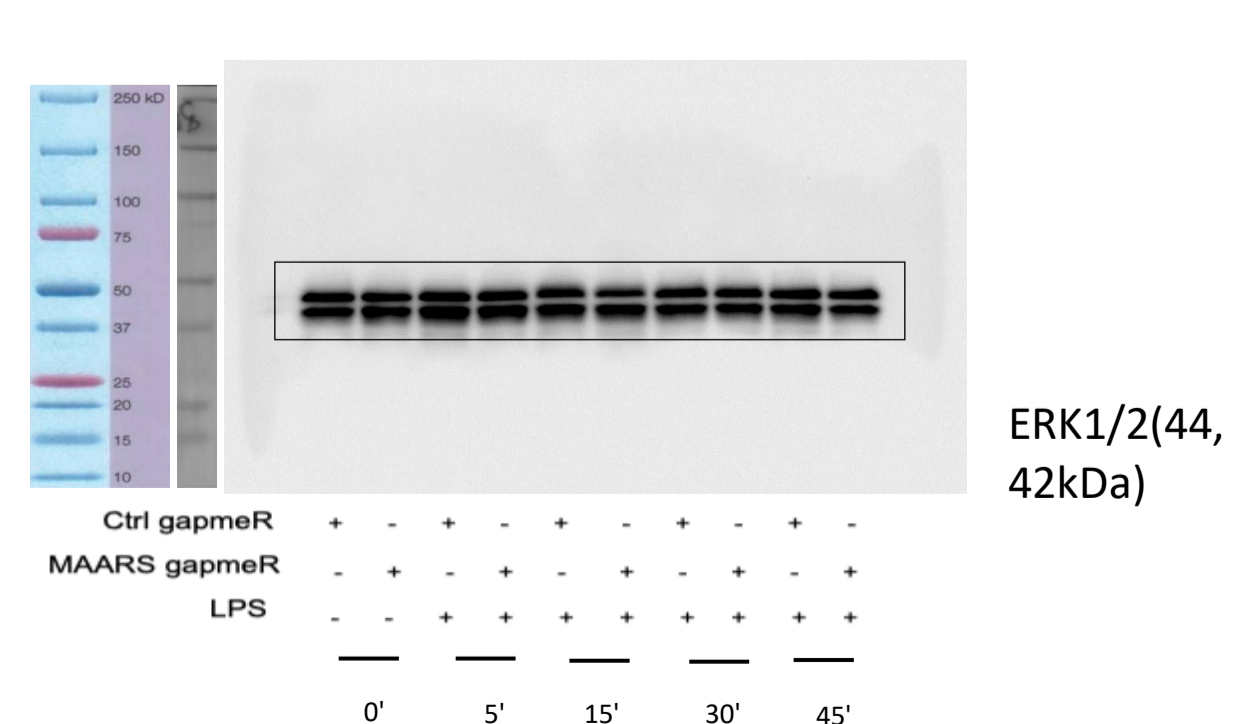

Suppl. 5b

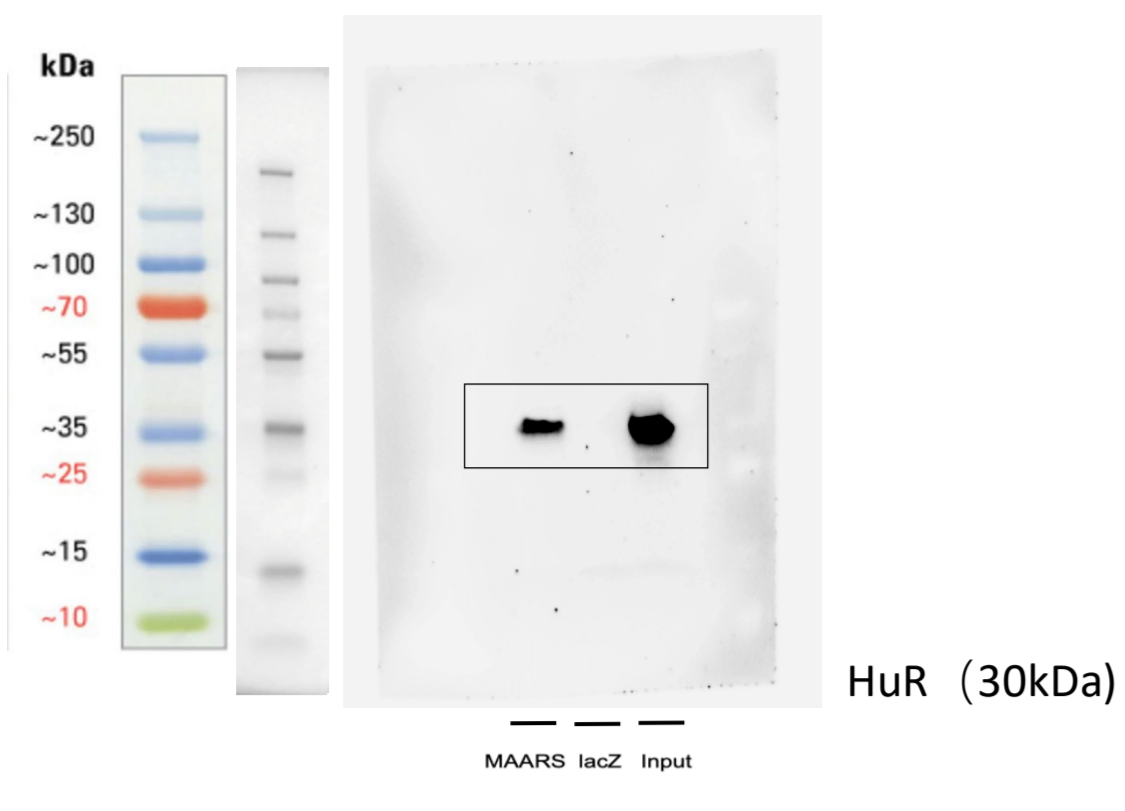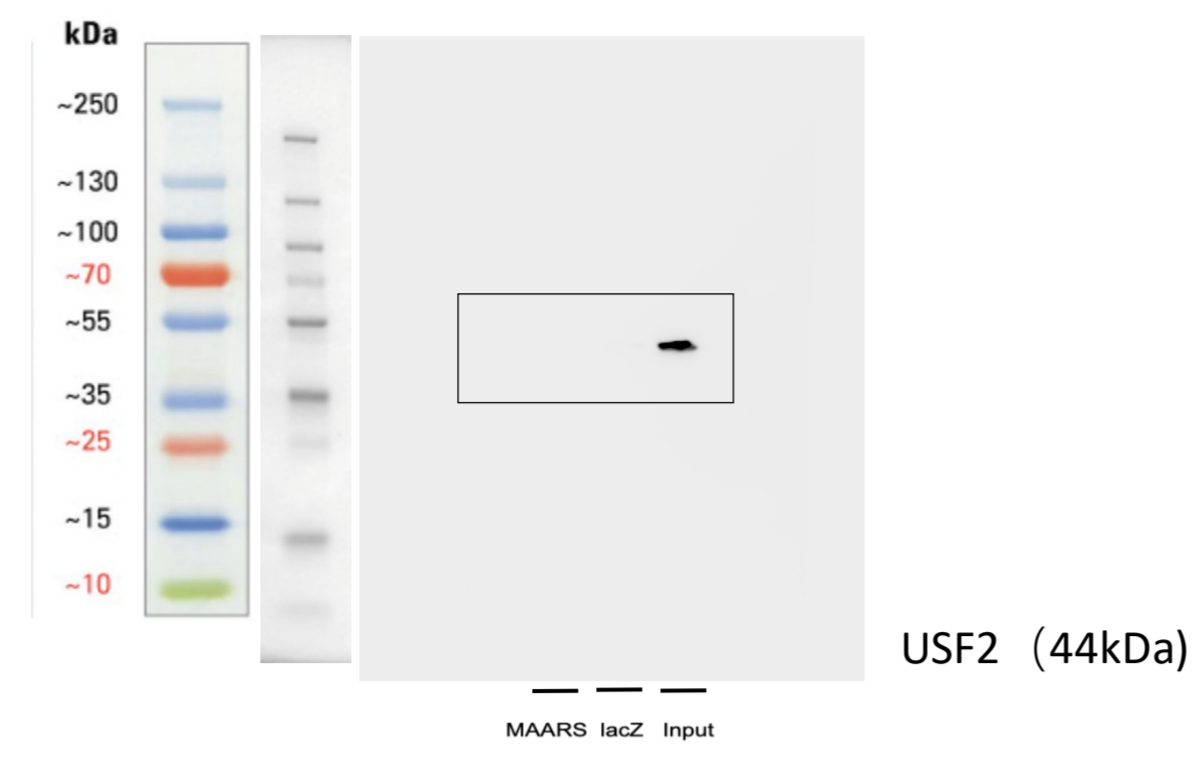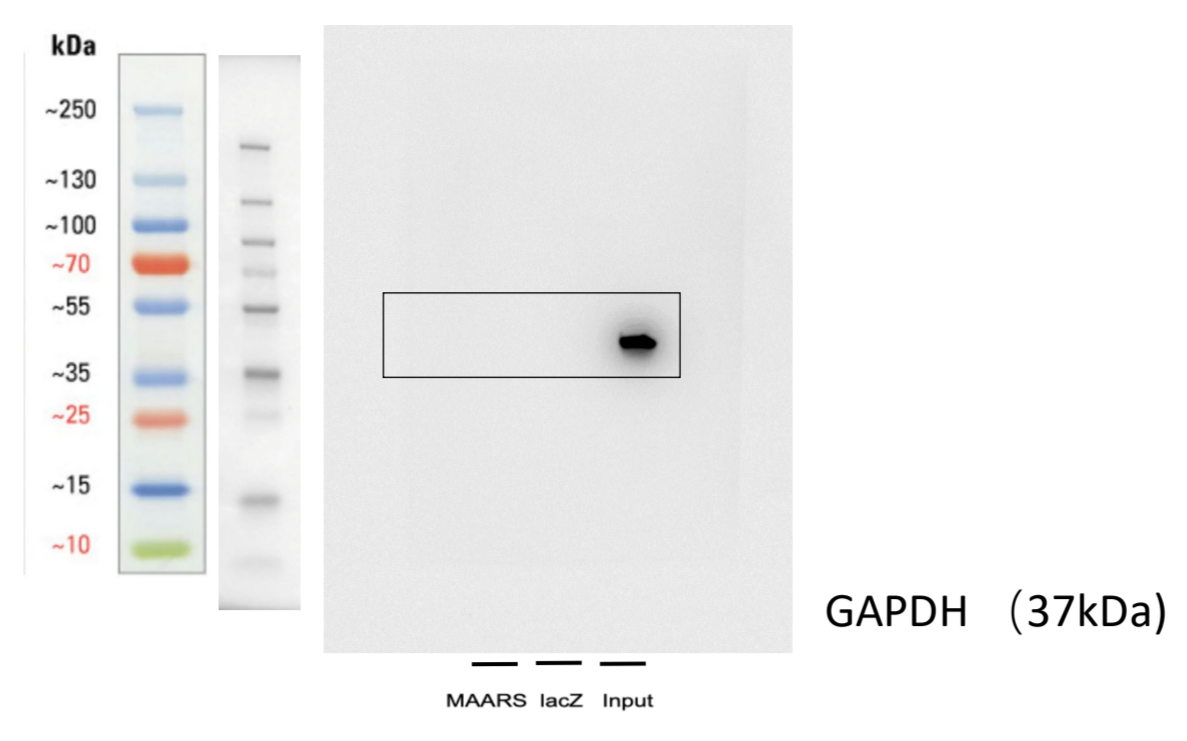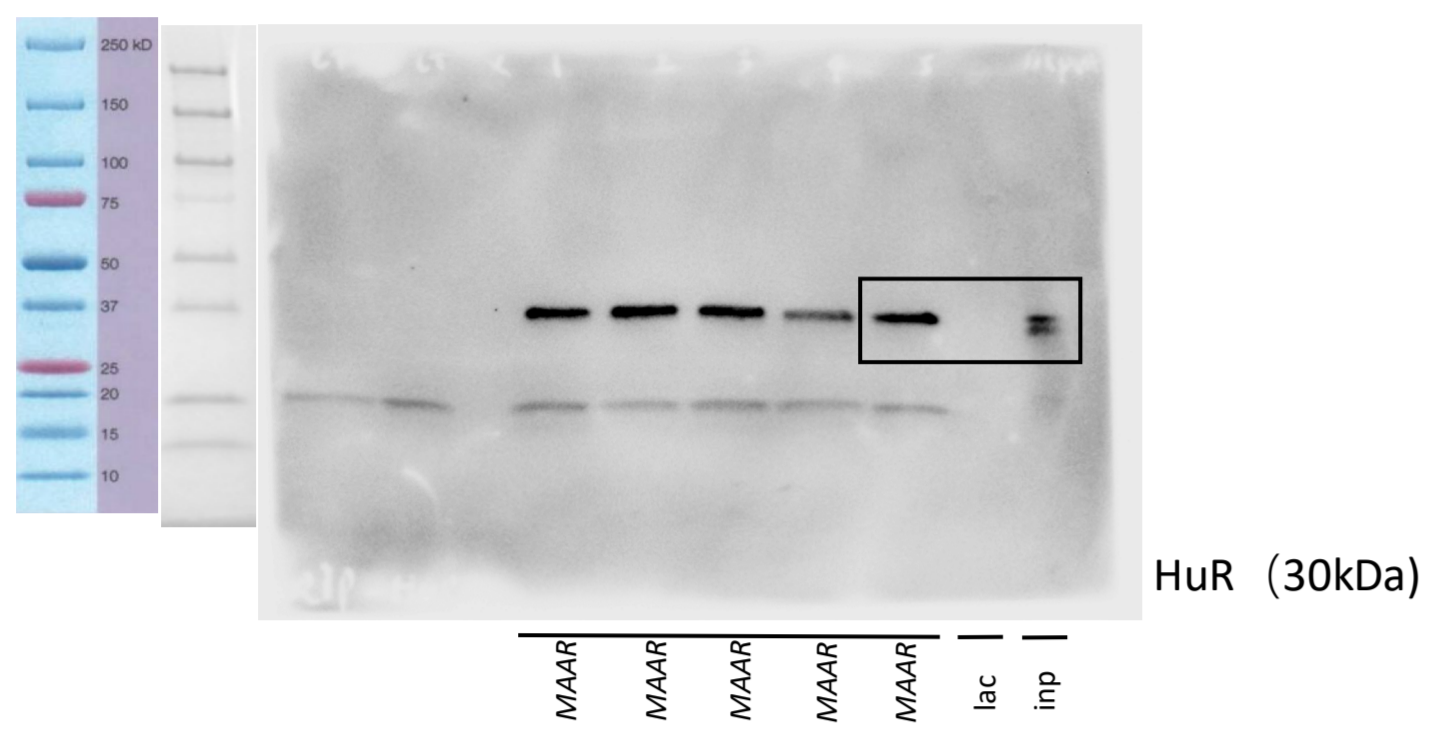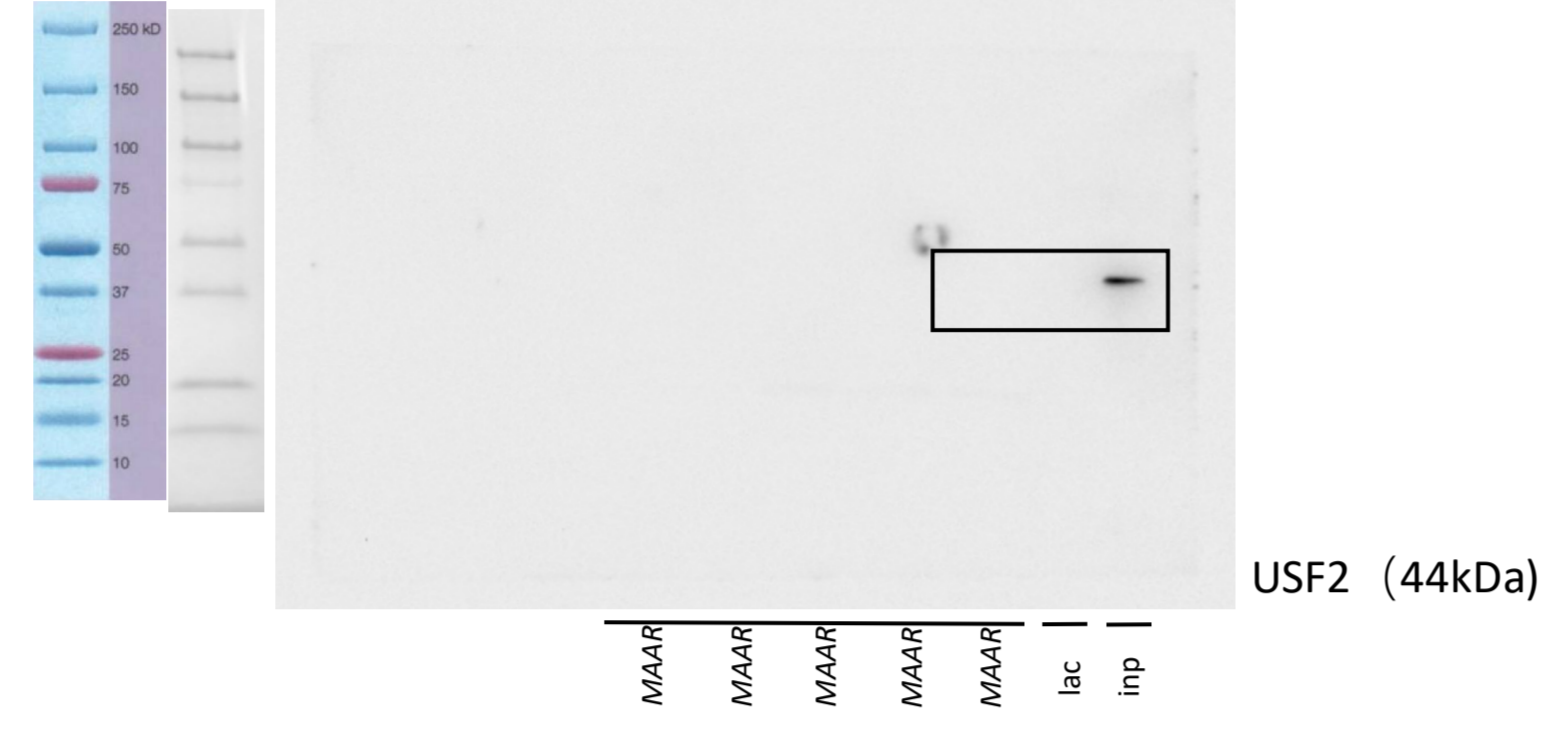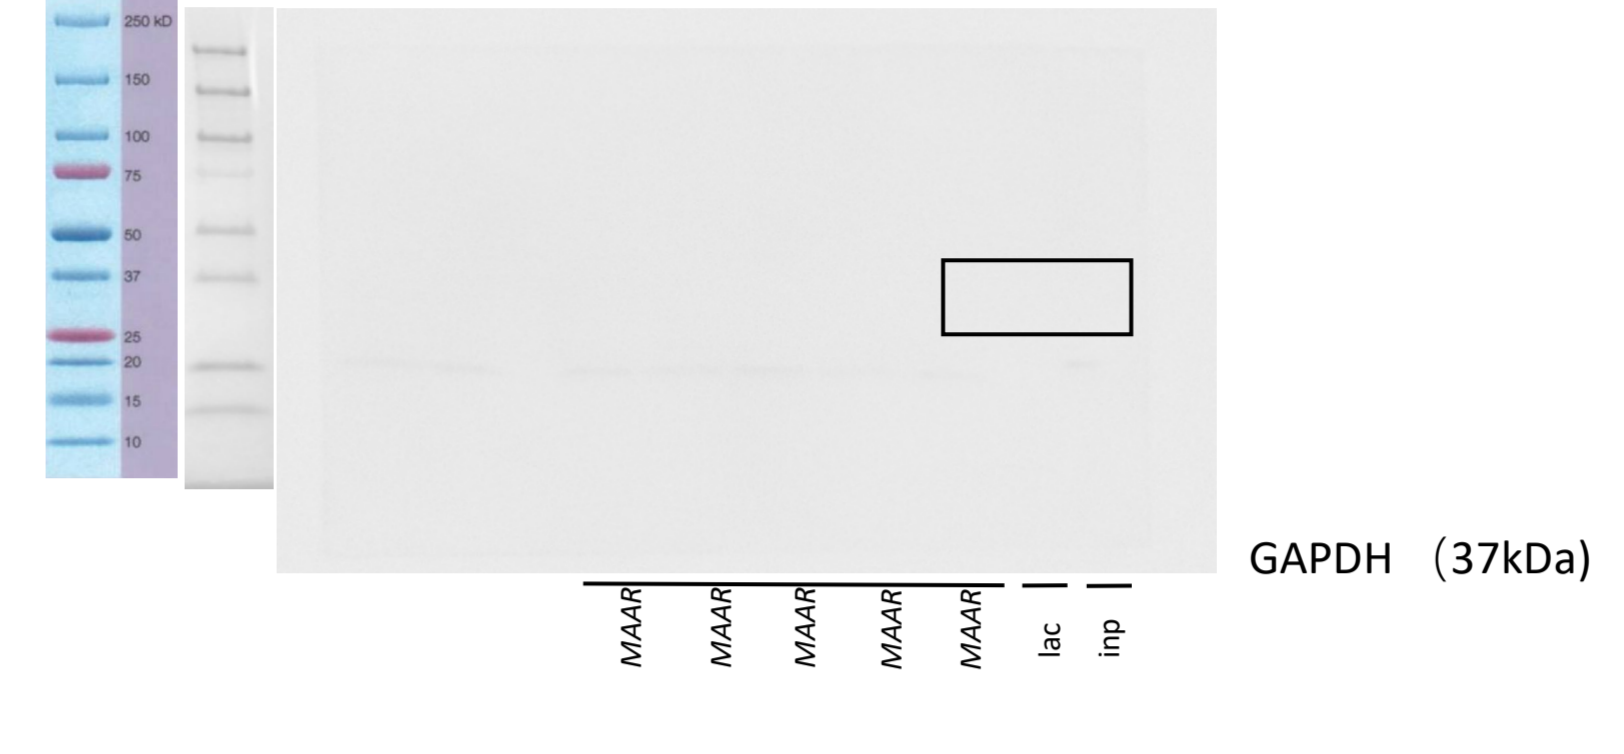

Suppl. 5c

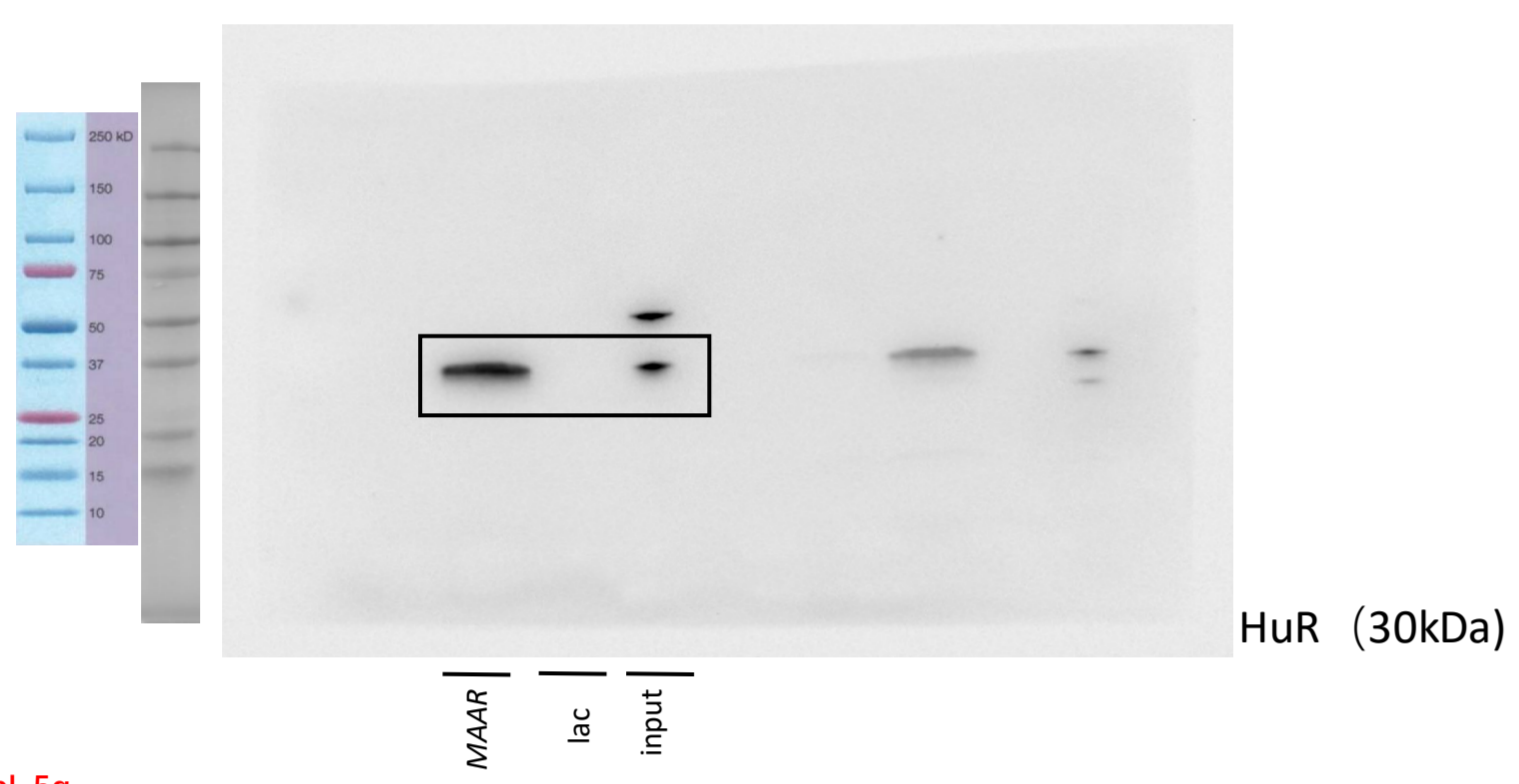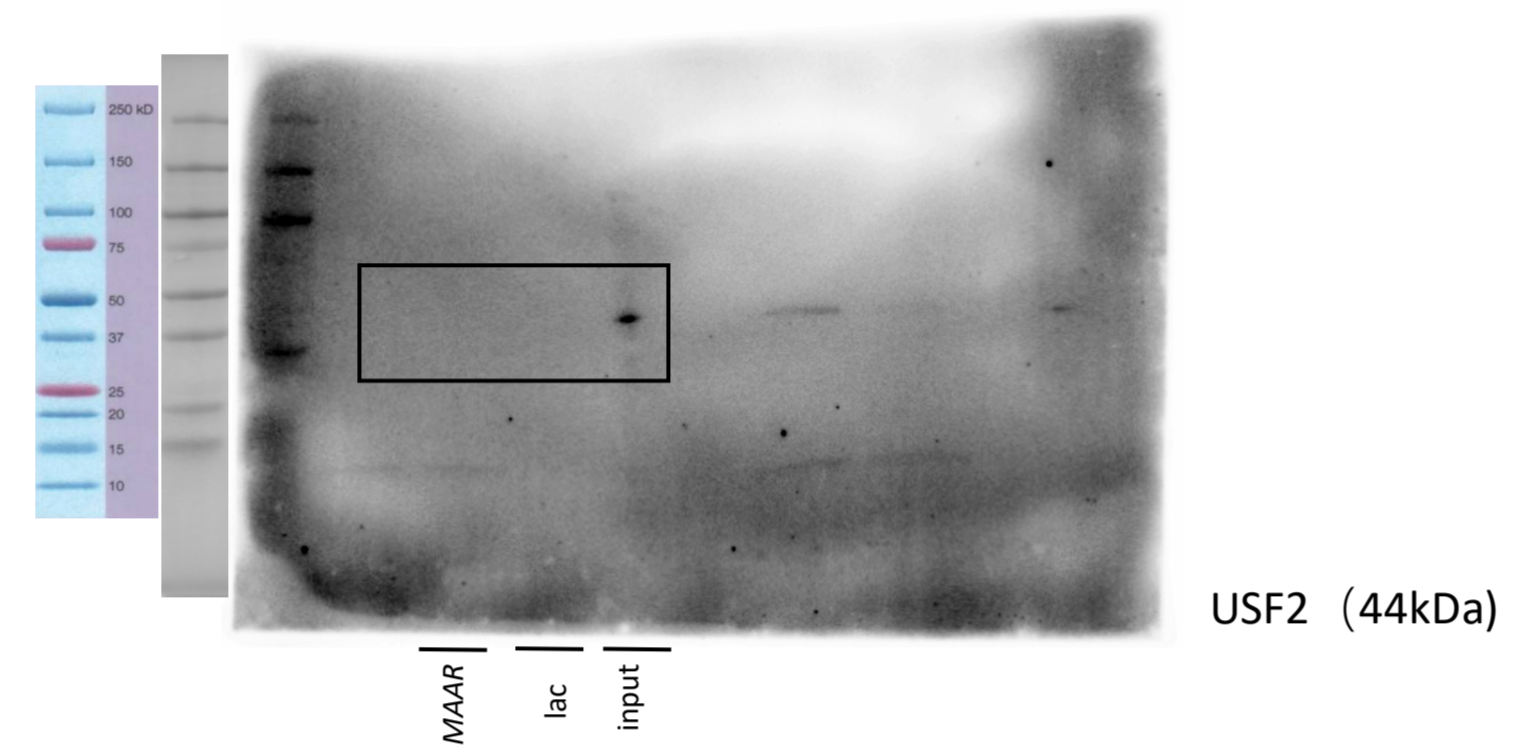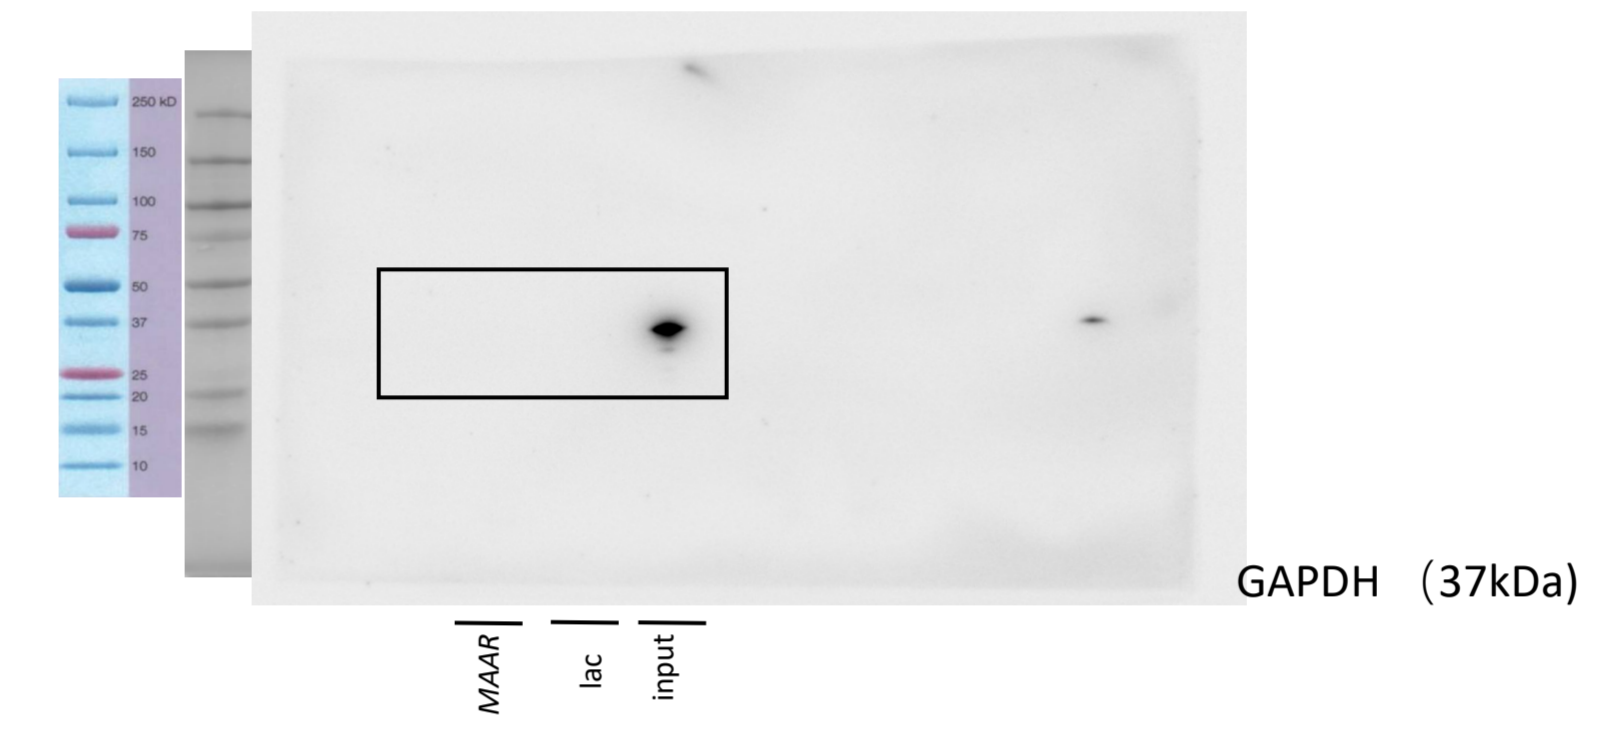

Suppl. 5g

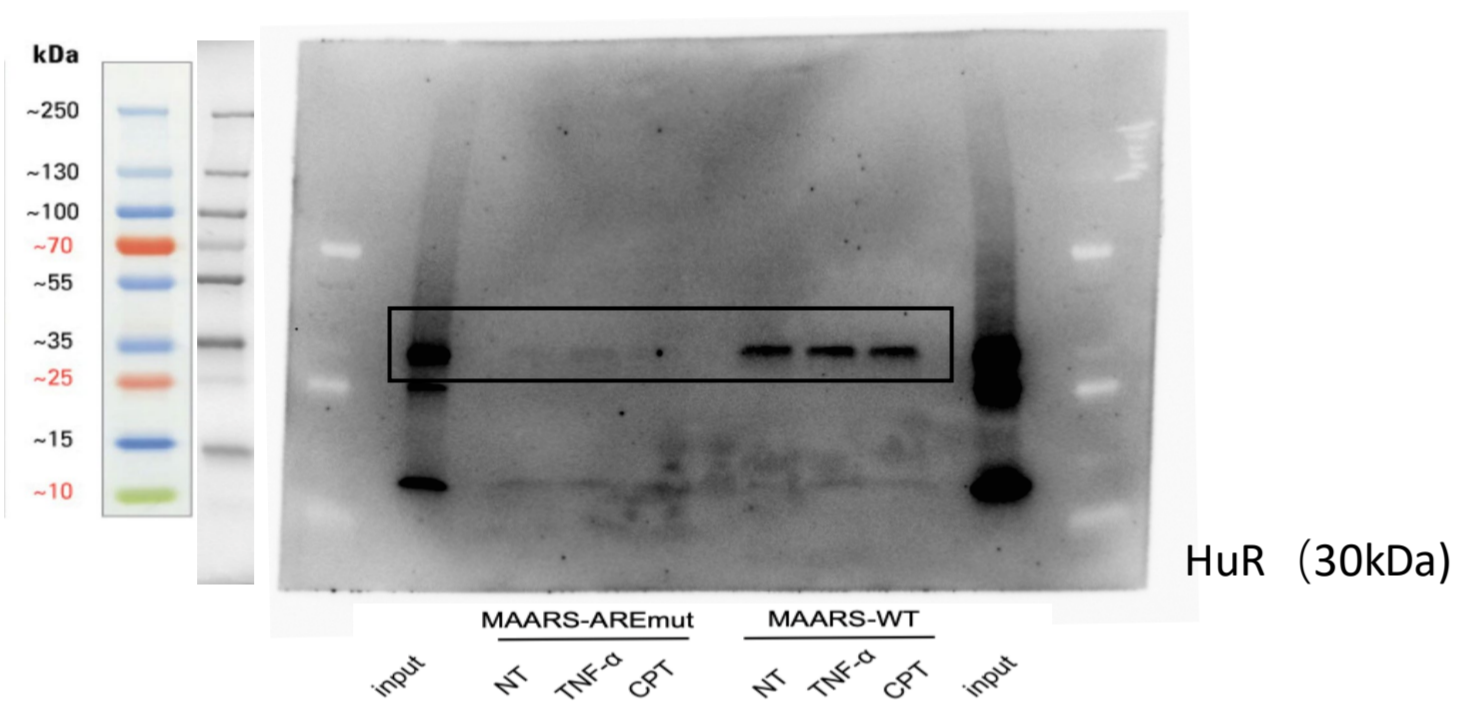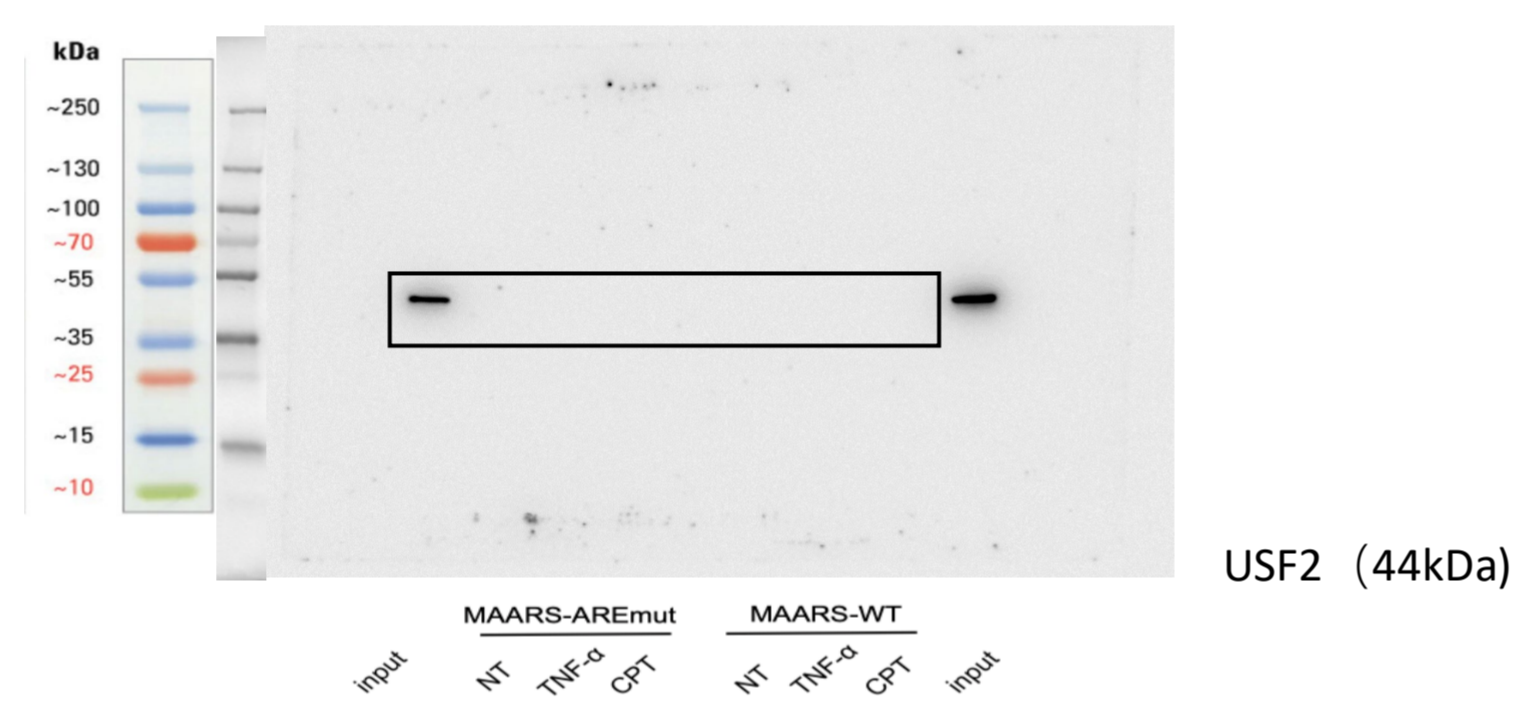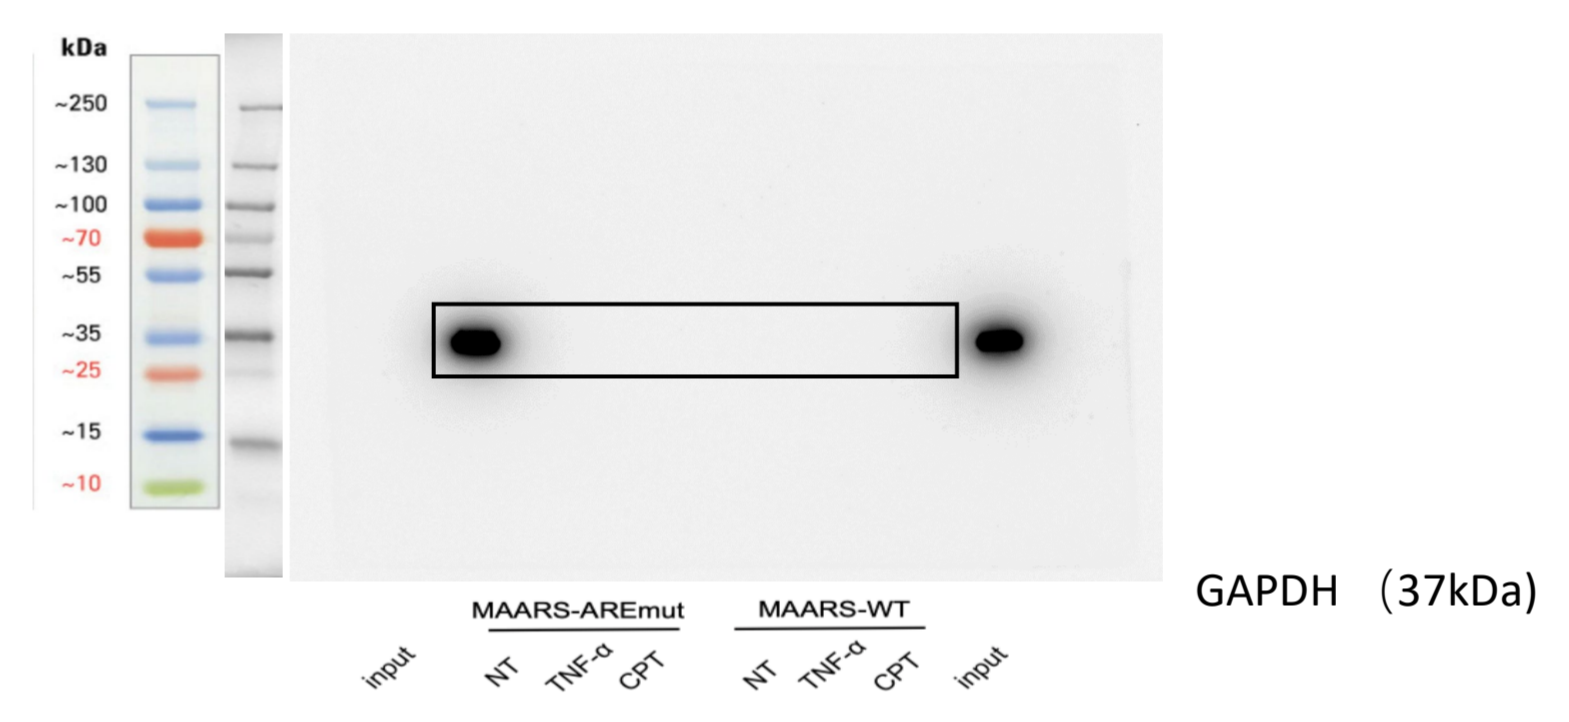

Suppl. 5h

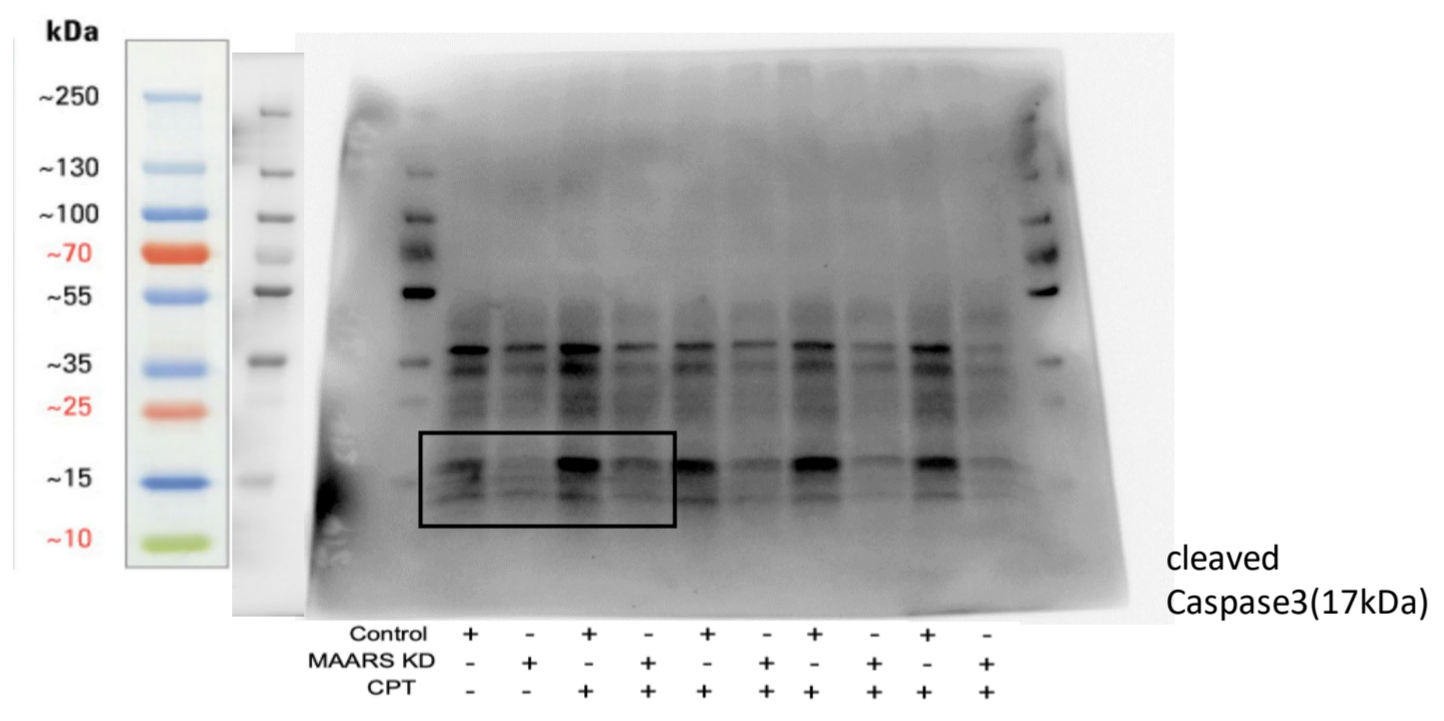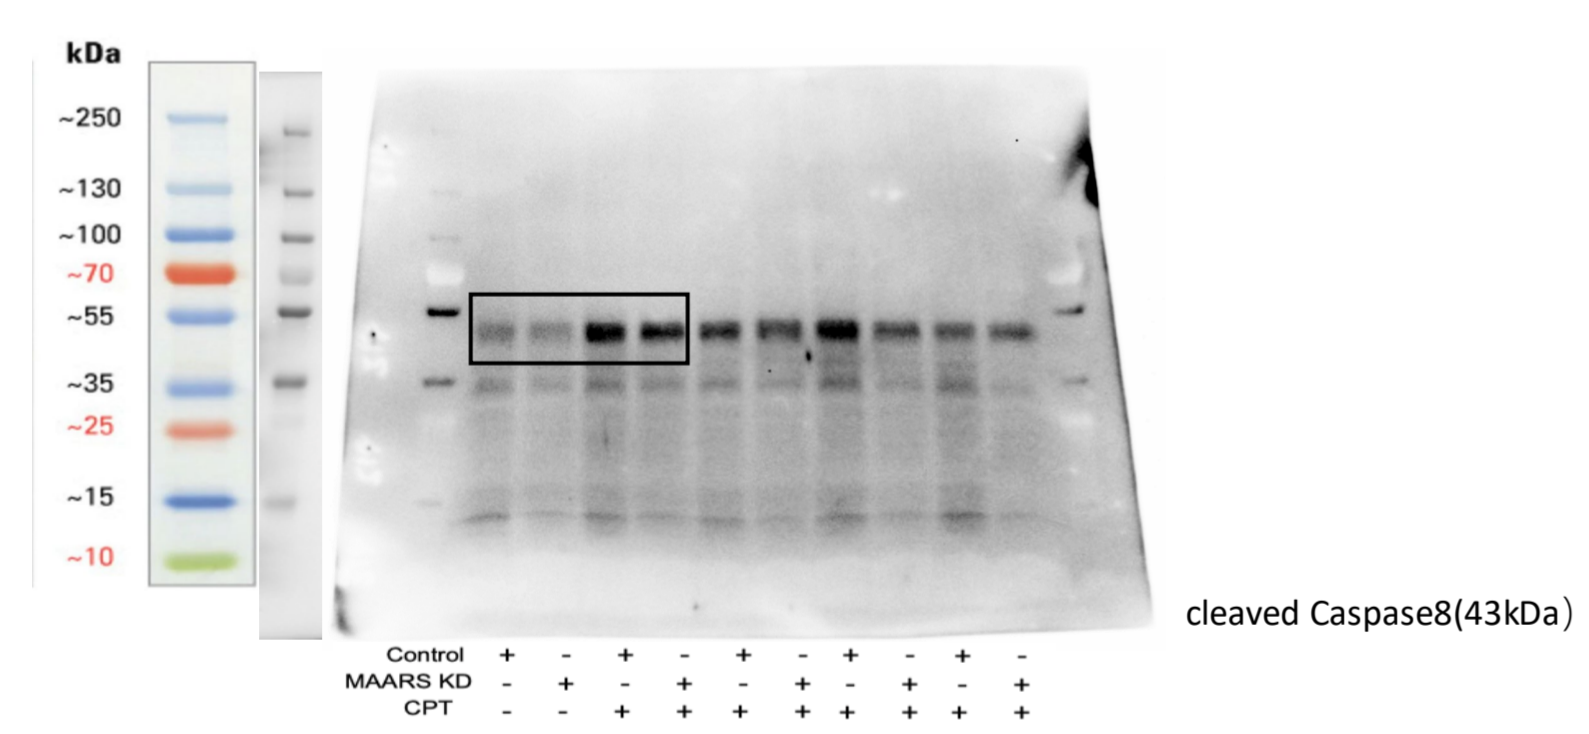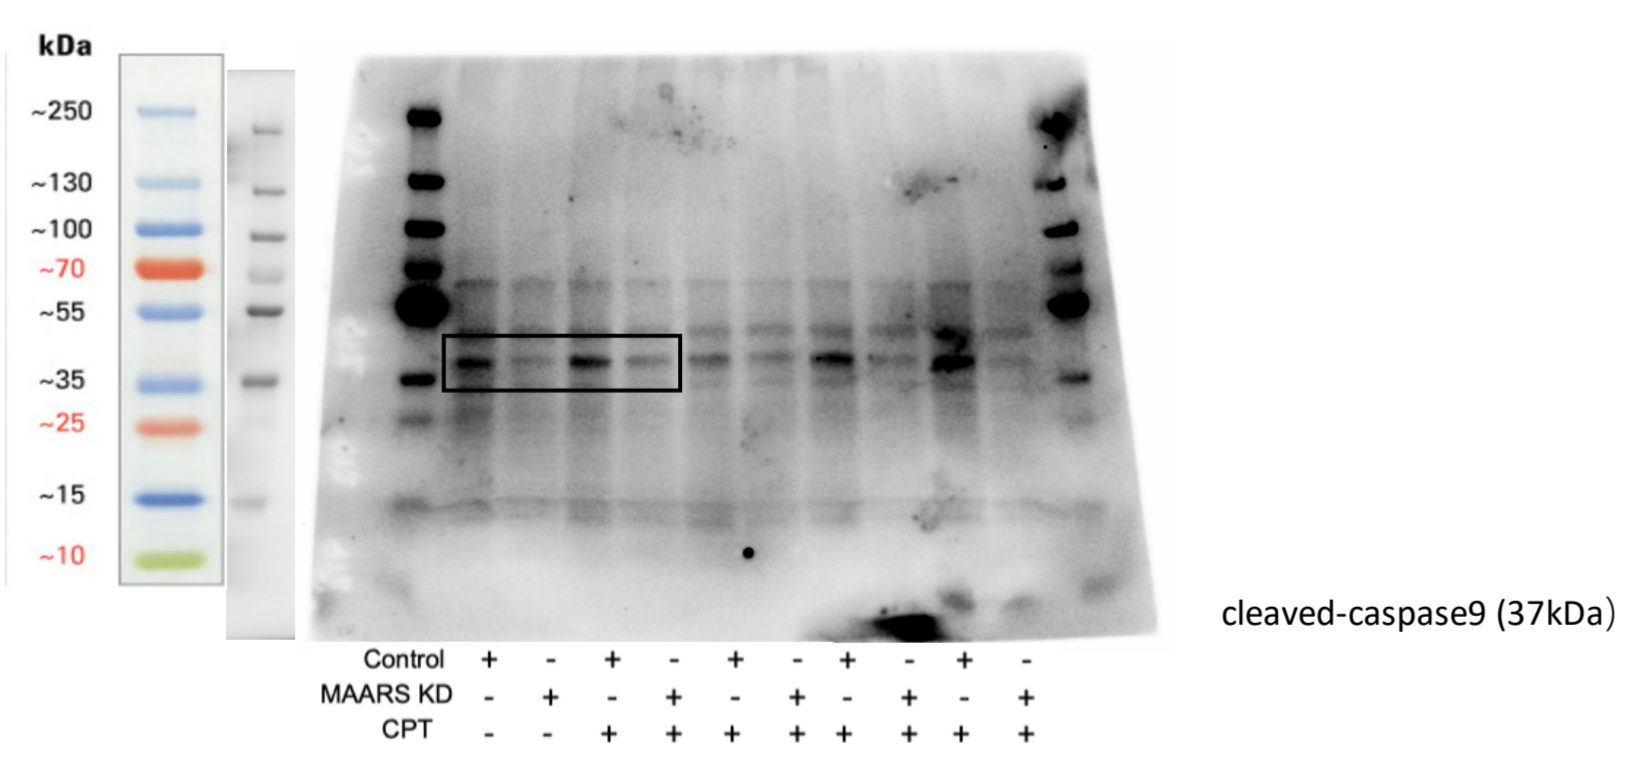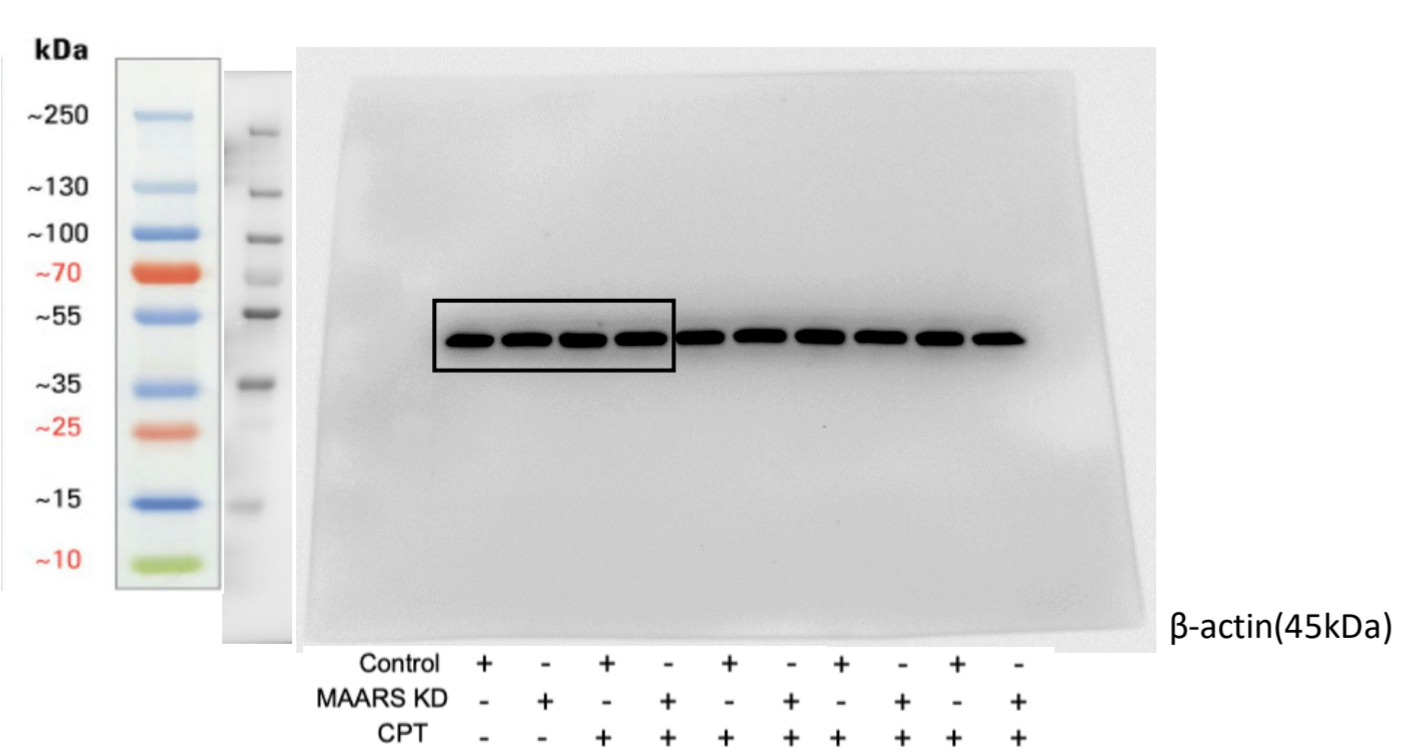

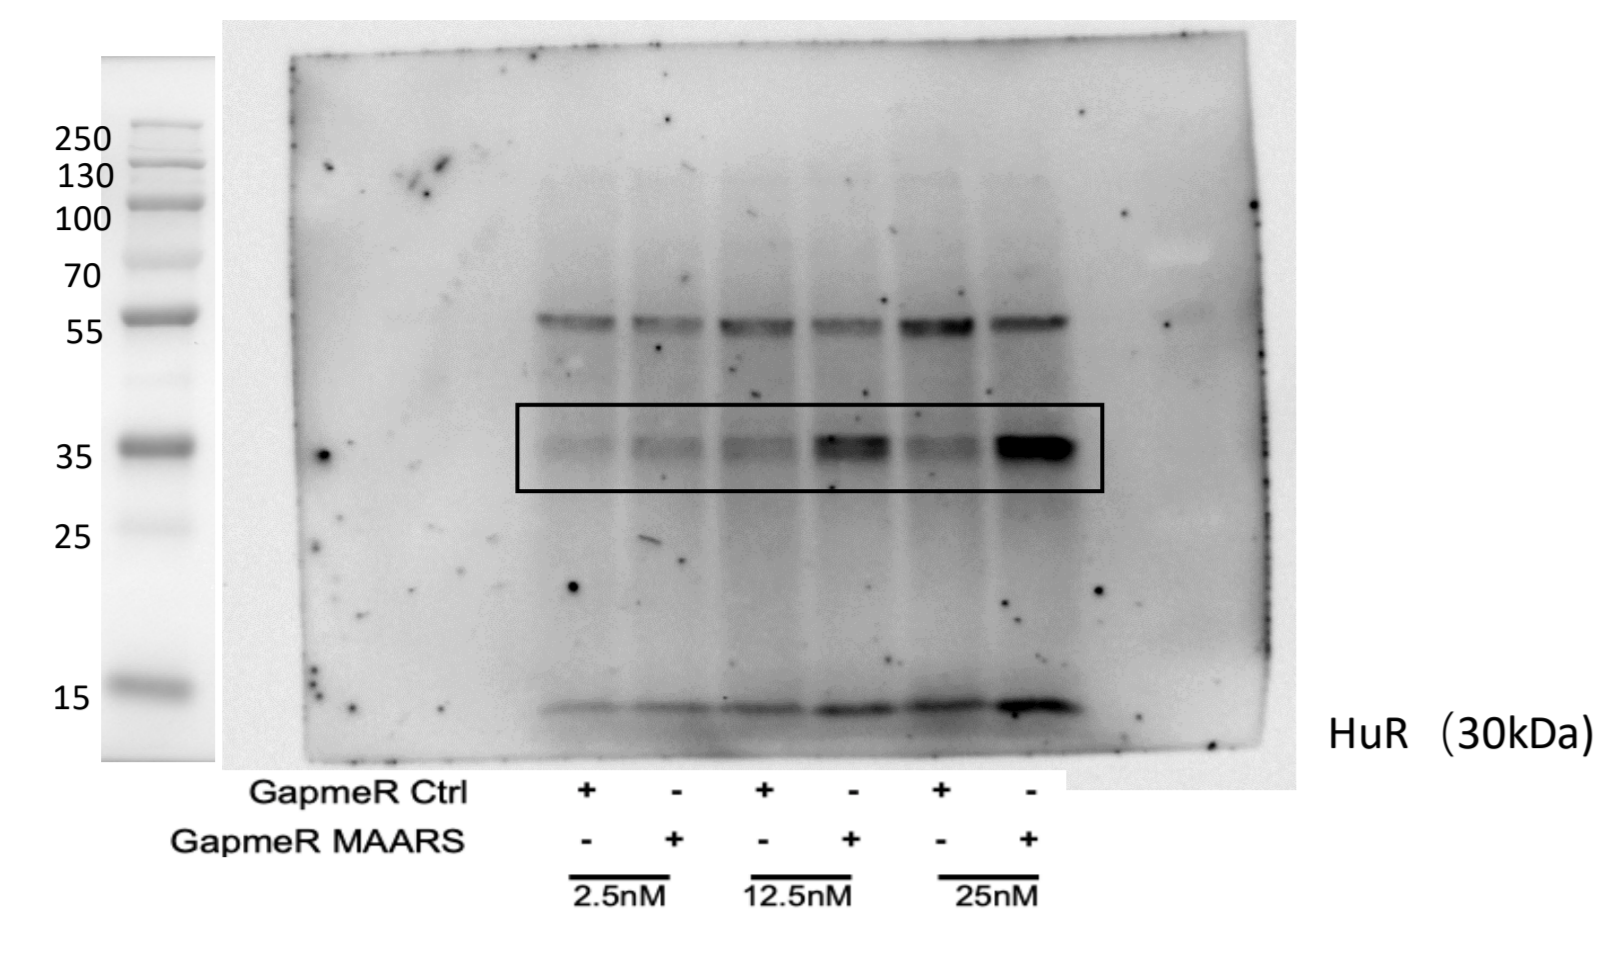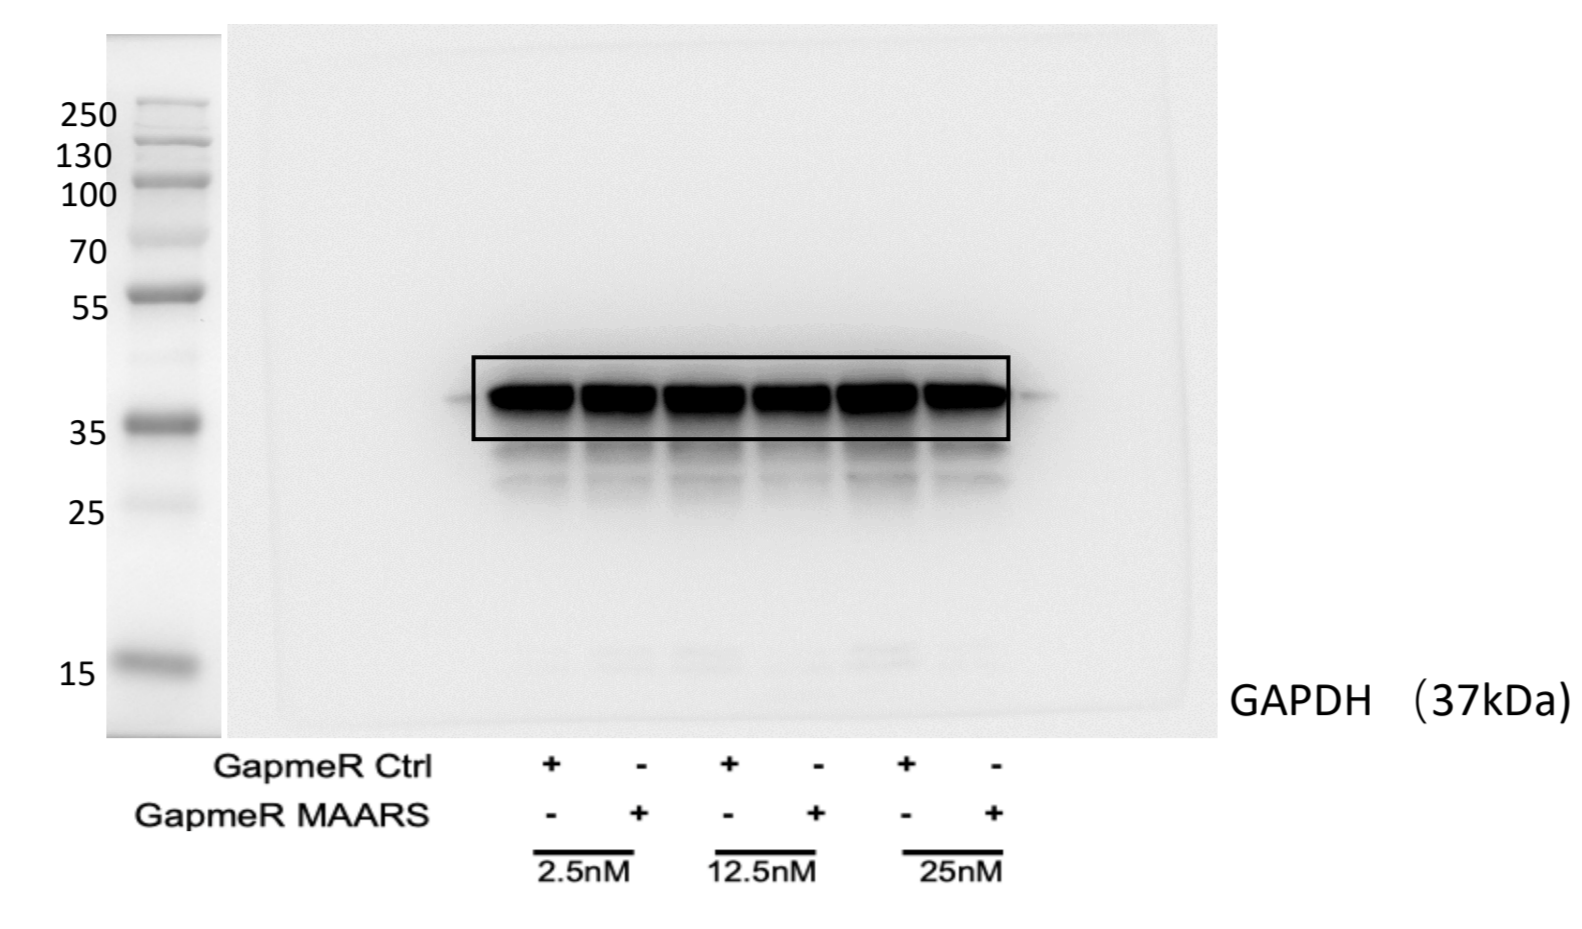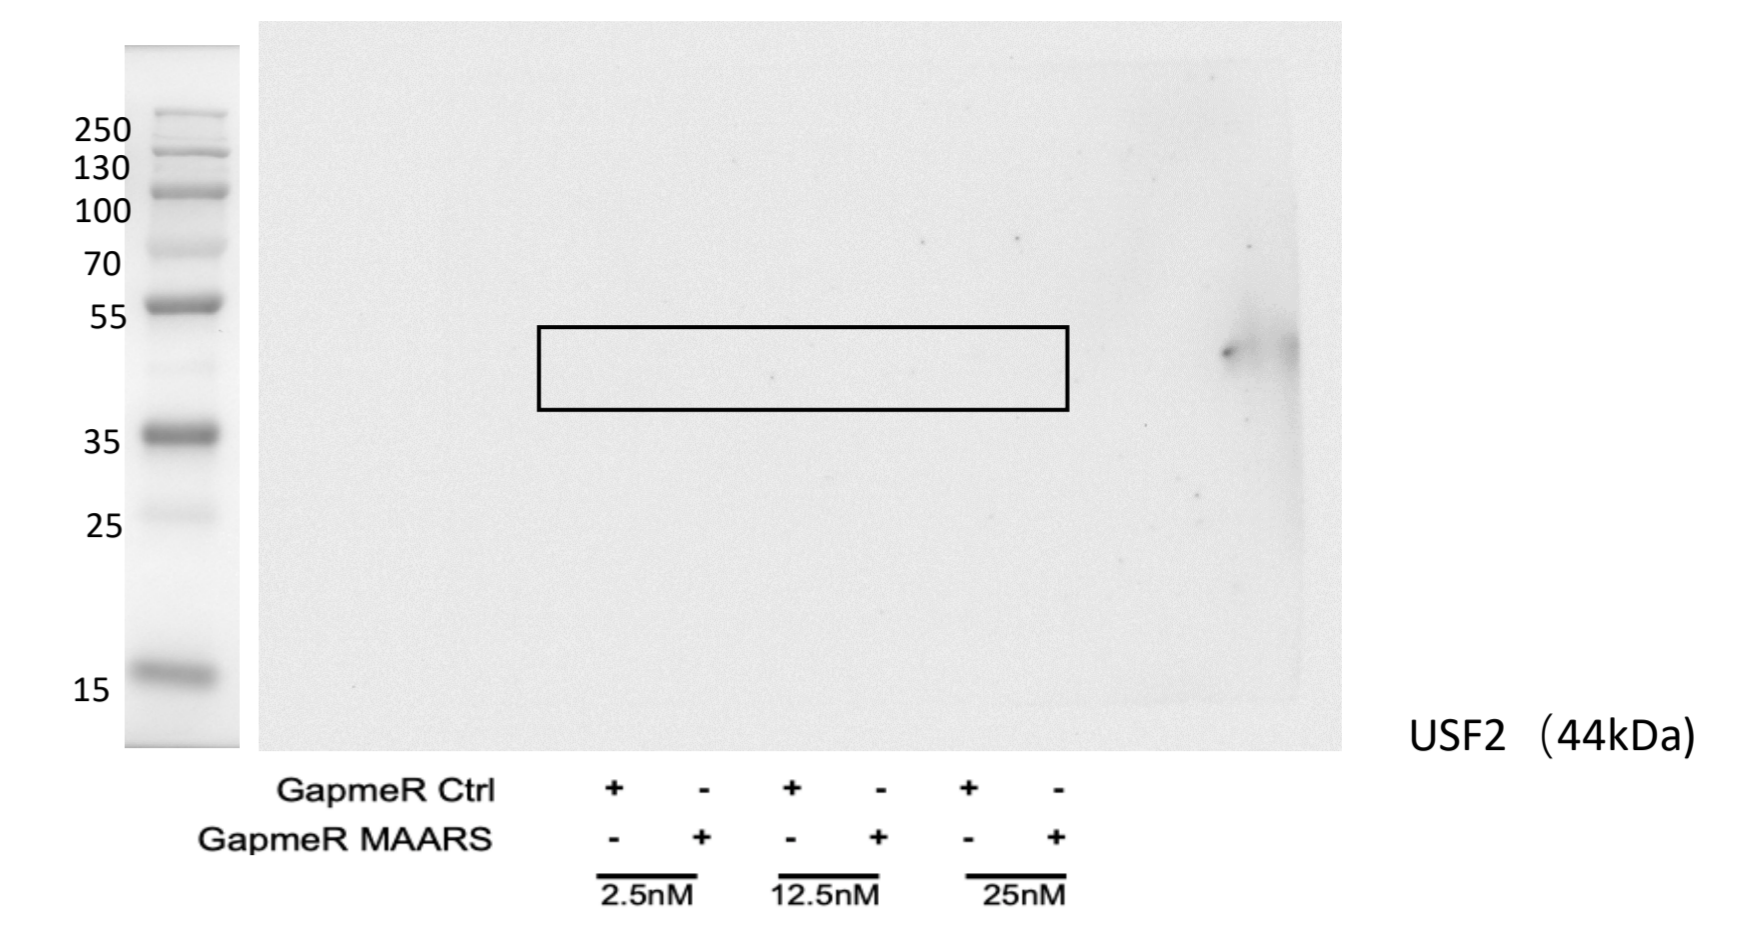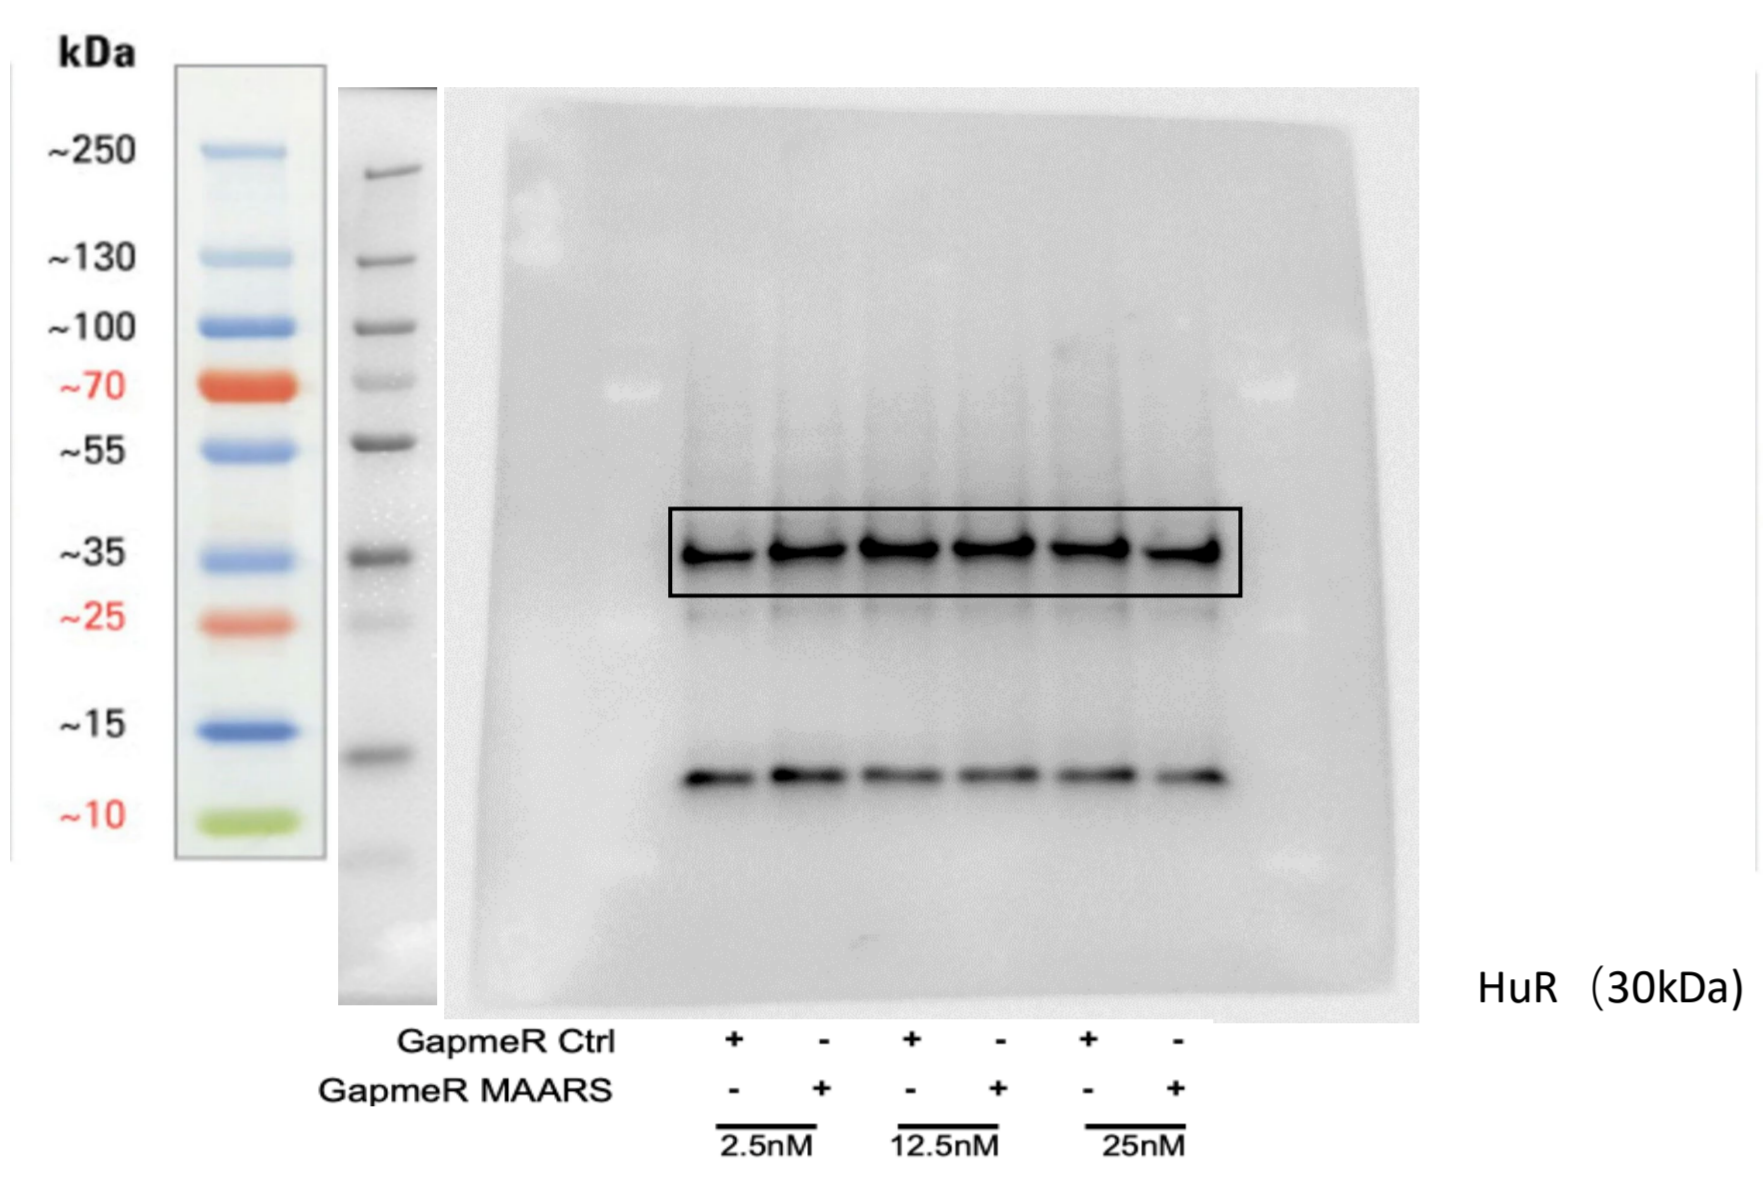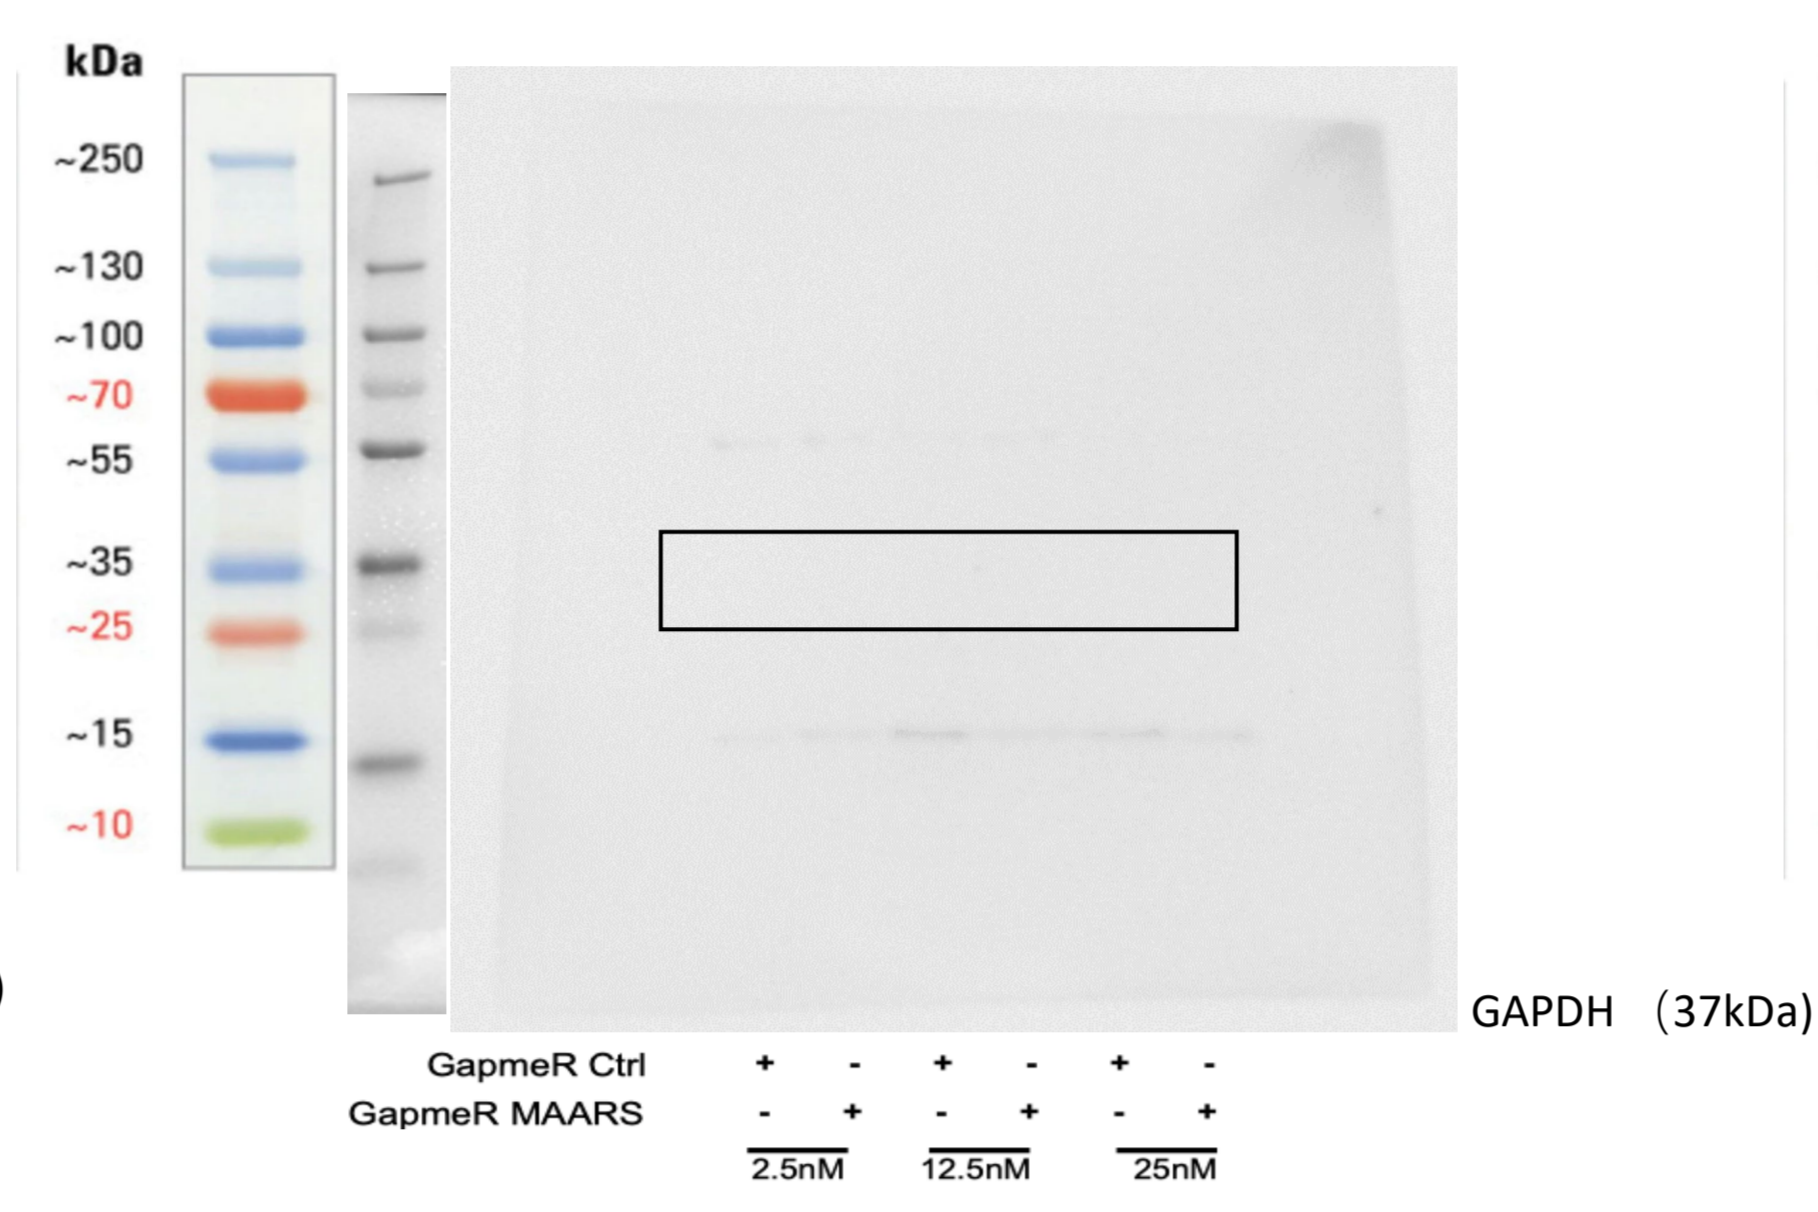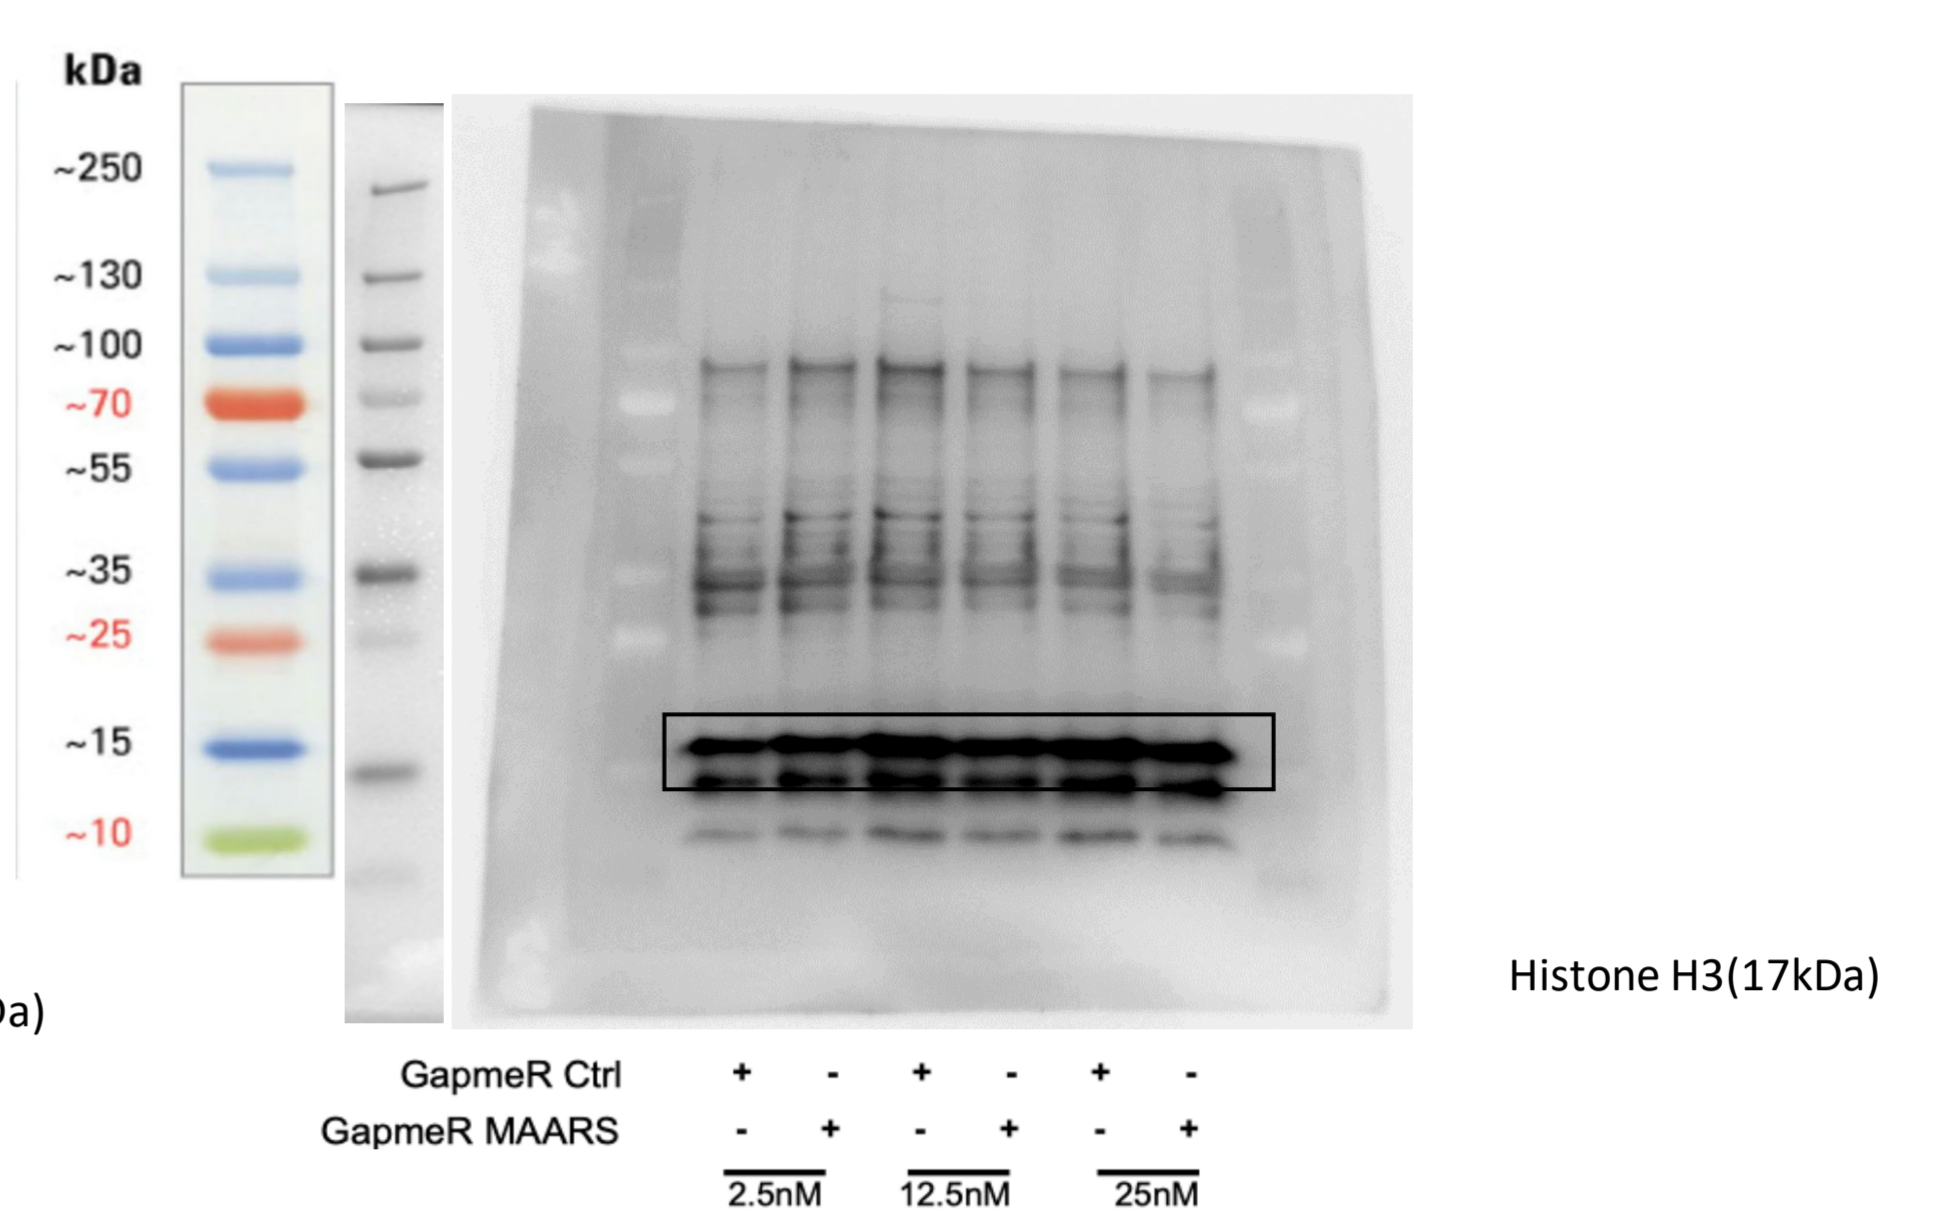

Suppl. 7e

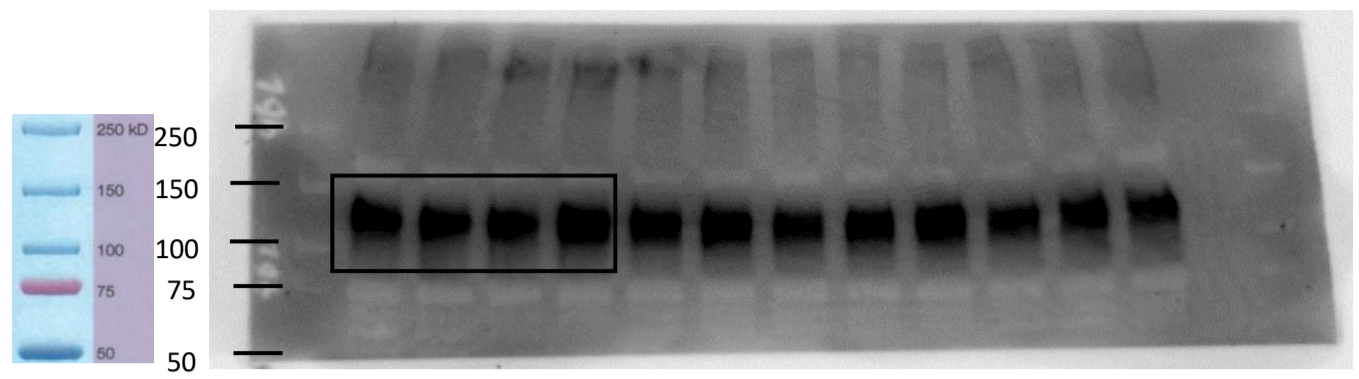

CD172a  
(120kDa)

|              |    |   |        |   |    |   |        |   |    |   |        |   |
|--------------|----|---|--------|---|----|---|--------|---|----|---|--------|---|
| Ctrl gapmeR  | +  | - | +      | - | +  | - | +      | - | +  | - | +      | - |
| MAARS gapmeR | -  | + | -      | + | -  | + | -      | + | -  | + | -      | + |
|              | NT |   | + A.C. |   | NT |   | + A.C. |   | NT |   | + A.C. |   |

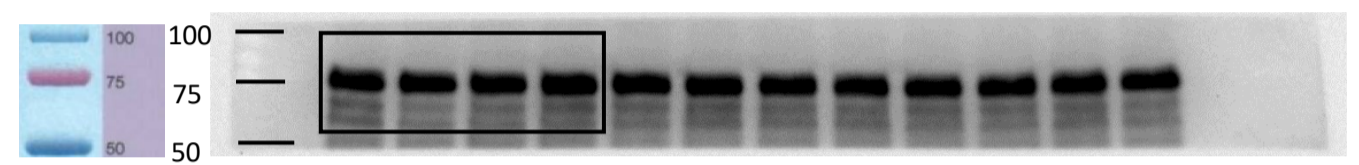

DRP1  
(78kDa)

|              |    |   |        |   |    |   |        |   |    |   |        |   |
|--------------|----|---|--------|---|----|---|--------|---|----|---|--------|---|
| Ctrl gapmeR  | +  | - | +      | - | +  | - | +      | - | +  | - | +      | - |
| MAARS gapmeR | -  | + | -      | + | -  | + | -      | + | -  | + | -      | + |
|              | NT |   | + A.C. |   | NT |   | + A.C. |   | NT |   | + A.C. |   |

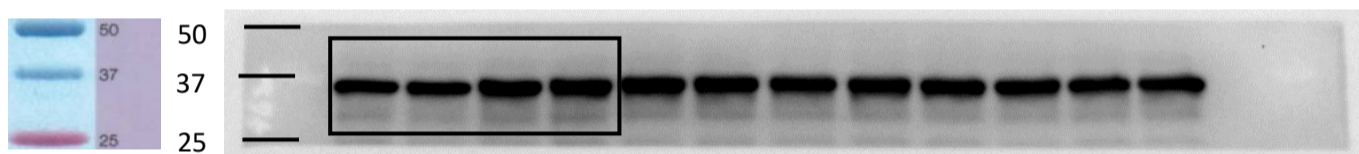

GAPDH (37kDa)

|              |    |   |        |   |    |   |        |   |    |   |        |   |
|--------------|----|---|--------|---|----|---|--------|---|----|---|--------|---|
| Ctrl gapmeR  | +  | - | +      | - | +  | - | +      | - | +  | - | +      | - |
| MAARS gapmeR | -  | + | -      | + | -  | + | -      | + | -  | + | -      | + |
|              | NT |   | + A.C. |   | NT |   | + A.C. |   | NT |   | + A.C. |   |
